# Supplementary material
Source: publisher figshare collection journal article supplement (https://gsajournals.figshare.com/ndownloader/files/38790309)
Supplement: Supplementary file 1 [file 38790309]

## Sheet: ChitiliLakeChL_F
Table S4. Genome-wide coverage in 10Kb windows for female (spreadsheets ending in _F) and male (spreadsheets ending in _M) assemblies. Windows surpassing the top 99% quantile of the median-normalized coverage ratio between sexes, and a median-normalized coverage difference between sexes above 0.25 in the sex of the assembly. Within each window, median values for each position were used to compute…
Linkage_Group	pos	FmedianNormalWind	MmedianNormalWind	ratiomedianNormWind_FM	differenceNormWind_FM	Wilcox_statist	Wilcox_p_value	Wilcox_confint1	Wilcox_confint2
LG01	7925000	1.01472	0.493146	2.05765	0.521578	90865176	0	0.54996	0.549936
LG01	7935000	0.926262	0.520368	1.78001	0.405894	80977428	0	0.400091	0.44999
LG01	31055000	0.887531	0.4986	1.78005	0.388931	8.094e+07	0	0.399992	0.400001
LG01	31065000	0.854725	0.50113	1.70559	0.353595	7.7886e+07	0	0.350052	0.39995
LG01	31075000	0.894676	0.555104	1.61172	0.339571	7.6e+07	0	0.349967	0.350008
LG02	1845000	0.868503	0.506469	1.71482	0.362034	7.07662e+07	0	0.399983	0.400049
LG02	11015000	0.455619	0.272548	1.67171	0.183072	64859649	7.26784e-291	0.149922	0.150032
LG02	11035000	0.505014	0.277572	1.8194	0.227442	70077935	0	0.249952	0.249934
LG02	11135000	0.808524	0.49742	1.62543	0.311104	7.70645e+07	0	0.300023	0.30002
LG02	11155000	0.762749	0.300485	2.53839	0.462264	8.76331e+07	0	0.499974	0.500015
LG02	11195000	0.665363	0.413739	1.60817	0.251625	6.94669e+07	0	0.299922	0.30003
LG02	11225000	0.391586	0.186561	2.09897	0.205024	7.42436e+07	0	0.199948	0.200089
LG02	18645000	1.00698	0.576172	1.74771	0.430812	75081011	0	0.50006	0.549933
LG02	19685000	0.55441	0.298455	1.8576	0.255954	71890186	0	0.299975	0.300004
LG02	20835000	0.700985	0.363209	1.92998	0.337776	80282197	0	0.350009	0.399959
LG03	19115000	0.577592	0.105131	5.49402	0.472461	8.8174e+07	0	0.499997	0.499963
LG03	22775000	0.543953	0.027064	20.0988	0.516889	9.35327e+07	0	0.499994	0.500015
LG03	25215000	0.385111	0.0241309	15.9593	0.360981	91499168	0	0.285749	0.321433
LG04	10835000	0.795945	0.281505	2.82746	0.51444	8.23789e+07	0	0.599972	0.627741
LG04	11135000	0.722523	0.20453	3.53261	0.517993	9.05435e+07	0	0.549983	0.550042
LG04	14915000	0.366548	0.0457177	8.01765	0.320831	81809871	0	0.299968	0.300043
LG04	16275000	0.680342	0.272373	2.49783	0.407969	72993608	0	0.377791	0.405513
LG04	16355000	0.998325	0.431673	2.31269	0.566652	7.84352e+07	0	0.738909	0.76111
LG04	16715000	0.893386	0.361719	2.46983	0.531666	8.83642e+07	0	0.555573	0.577756
LG05	575000	0.882357	0.420753	2.09709	0.461604	83321696	0	0.500044	0.549987
LG05	585000	0.831582	0.378492	2.19709	0.45309	8.53142e+07	0	0.499968	0.499946
LG05	595000	1.02011	0.589926	1.72921	0.430182	8.079e+07	0	0.450047	0.499964
LG05	16815000	0.806409	0.45325	1.77917	0.35316	73455180	0	0.349979	0.350037
LG05	18805000	0.704895	0.364769	1.93244	0.340126	7.75752e+07	0	0.350004	0.399984
LG06	6965000	0.267438	0.0358853	7.45259	0.231553	9.27384e+07	0	0.249942	0.24994
LG06	24275000	0.621423	0.0637547	9.74709	0.557668	99257122	0	0.549962	0.549925
LG06	24285000	0.704095	0.376007	1.87256	0.328088	7.76813e+07	0	0.349987	0.361118
LG06	24295000	0.69782	0.260618	2.67756	0.437202	8.72929e+07	0	0.477726	0.483337
LG06	24305000	0.70306	0.0623771	11.2711	0.640683	98753492	0	0.649992	0.650027
LG06	24315000	0.721768	0.248975	2.89896	0.472793	84171447	0	0.500026	0.522275
LG06	29195000	0.594016	0.323012	1.83899	0.271003	7.87947e+07	0	0.272299	0.288812
LG07	28725000	0.366238	0.238781	1.53378	0.127457	6.55344e+07	0	0.100014	0.14995
LG07	30585000	0.49923	0.310274	1.609	0.188956	66682940	0	0.19997	0.200042
LG07	30595000	0.342101	0.176747	1.93554	0.165353	72986702	0	0.199966	0.199963
LG08	2415000	0.926717	0.611509	1.51546	0.315208	75199862	0	0.300006	0.349968
LG08	2525000	0.878992	0.571818	1.53719	0.307174	71386845	0	0.300048	0.349959
LG08	4305000	0.674628	0.404325	1.66853	0.270303	#N/A	#N/A	#N/A	#N/A
LG08	14085000	0.819248	0.380532	2.1529	0.438716	#N/A	#N/A	#N/A	#N/A
LG08	14095000	0.791971	0.34765	2.27807	0.444321	#N/A	#N/A	#N/A	#N/A
LG08	14135000	0.791881	0.520358	1.5218	0.271523	#N/A	#N/A	#N/A	#N/A
LG08	14235000	0.561714	0.288801	1.94498	0.272913	#N/A	#N/A	#N/A	#N/A
LG08	18435000	0.428947	0.24672	1.7386	0.182227	#N/A	#N/A	#N/A	#N/A
LG09	1225000	0.43814	0.174521	2.51052	0.263618	76228619	0	0.277859	0.333283
LG09	2745000	0.266973	0.119233	2.2391	0.147741	6.6179e+07	0	0.0555736	0.0556291
LG09	7465000	0.650874	0.311024	2.09268	0.339849	82252436	0	0.333361	0.388843
LG10	11535000	0.869378	0.488868	1.77835	0.38051	7.80814e+07	0	0.383382	0.400015
LG10	13935000	0.920318	0.581381	1.58299	0.338937	7.37659e+07	0	0.355531	0.377783
LG10	14635000	1.0863	0.671877	1.61682	0.414424	8.1865e+07	0	0.438955	0.455616
LG10	15015000	0.756809	0.496728	1.52359	0.260081	73153490	0	0.255517	0.277767
LG10	15065000	0.825707	0.503327	1.6405	0.32238	7.24614e+07	0	0.333379	0.361098
LG10	17975000	0.613074	0.162656	3.76914	0.450418	80262439	0	0.533387	0.550013
LG10	17985000	0.703535	0.188892	3.72453	0.514642	8.84761e+07	0	0.538936	0.549973
LG10	18035000	0.865763	0.425385	2.03525	0.440378	8.44379e+07	0	0.444444	0.461093
LG10	18045000	0.871323	0.531869	1.63823	0.339454	6.76806e+07	0	0.333365	0.372191
LG11	19305000	0.256074	0.132359	1.9347	0.123715	68464061	0	0.10001	0.127863
LG11	28045000	0.60398	0.304636	1.98263	0.299343	76782602	0	0.349948	0.372149
LG13	1895000	0.317218	0.0327717	9.67963	0.284447	87166332	0	0.249925	0.249999
LG13	3875000	0.762959	0.480417	1.58812	0.282542	75945024	0	0.300032	0.300089
LG13	3915000	1.04074	0.672833	1.5468	0.367903	85767604	0	0.350031	0.399941
LG13	4425000	0.457269	0.302075	1.51376	0.155194	66196312	0	0.15001	0.150007
LG13	11205000	0.793381	0.532557	1.48976	0.260824	69748127	0	0.300044	0.349983
LG13	14825000	0.85327	0.593196	1.43843	0.260074	6.62432e+07	0	0.250054	0.299953
LG13	18365000	0.618758	0.440226	1.40555	0.178532	6.45482e+07	2.62934e-278	0.199979	0.200025
LG13	19685000	0.394811	0.19815	1.99248	0.19666	68701808	0	0.199993	0.199928
LG13	25895000	0.705179	0.495125	1.42424	0.210054	65780778	0	0.249999	0.250077
LG14	28285000	0.575327	0.356509	1.61378	0.218818	67673768	0	0.200056	0.249943
LG15	7155000	0.50319	0.309369	1.6265	0.193821	6.7472e+07	0	0.19995	0.199971
LG15	26025000	0.397475	0.219503	1.8108	0.177972	6.87871e+07	0	0.150036	0.199989
LG16	3065000	0.459154	0.237026	1.93714	0.222128	70080920	0	0.199956	0.20002
LG16	3085000	0.758399	0.385156	1.96907	0.373243	76143386	0	0.399963	0.400061
LG16	16075000	0.372838	0.182812	2.03946	0.190026	73297501	0	0.199957	0.200086
LG16	21365000	0.469823	0.275237	1.70697	0.194586	72965465	0	0.250046	0.299972
LG17	225000	0.542801	0.252155	2.15265	0.290646	81010517	0	0.299921	0.299975
LG17	28745000	0.489791	0.15107	3.24215	0.338721	8.0427e+07	0	0.34997	0.350037
LG18	18095000	0.312324	0.117316	2.66224	0.195008	#N/A	#N/A	#N/A	#N/A
LG18	18105000	0.556564	0.155573	3.5775	0.400991	#N/A	#N/A	#N/A	#N/A
LG18	21865000	0.491406	0.231455	2.12312	0.259951	#N/A	#N/A	#N/A	#N/A
LG18	21875000	0.521588	0.246525	2.11576	0.275062	#N/A	#N/A	#N/A	#N/A
LG18	21895000	0.330662	0.0620494	5.32902	0.268613	#N/A	#N/A	#N/A	#N/A
LG18	21905000	0.444281	0.192731	2.30519	0.25155	#N/A	#N/A	#N/A	#N/A
LG18	21925000	0.470568	0.173688	2.70927	0.29688	#N/A	#N/A	#N/A	#N/A
LG18	21935000	0.707754	0.0831417	8.51263	0.624613	#N/A	#N/A	#N/A	#N/A
LG18	21945000	0.529112	0.230988	2.29065	0.298124	#N/A	#N/A	#N/A	#N/A
LG18	21955000	0.309189	0.153429	2.01519	0.15576	#N/A	#N/A	#N/A	#N/A
LG18	23195000	0.452425	0.152485	2.96702	0.29994	#N/A	#N/A	#N/A	#N/A
LG18	27765000	0.896785	0.420725	2.13153	0.476061	#N/A	#N/A	#N/A	#N/A
LG18	27785000	0.635936	0.177666	3.5794	0.458271	#N/A	#N/A	#N/A	#N/A
LG18	27795000	0.564659	0.119716	4.71666	0.444943	#N/A	#N/A	#N/A	#N/A
LG18	27805000	0.563414	0.155323	3.62736	0.40809	#N/A	#N/A	#N/A	#N/A
LG19	5785000	0.486826	0.200925	2.42293	0.285901	7.50295e+07	0	0.30002	0.349973
LG19	17515000	0.368133	0.19575	1.88063	0.172383	6.89824e+07	0	0.149974	0.150018
LG19	22105000	0.481647	0.156824	3.07125	0.324823	7.97235e+07	0	0.299974	0.300024
LG20	1655000	0.49745	0.307949	1.61536	0.189501	69804348	0	0.199966	0.200037
LG20	1685000	0.369978	0.221038	1.67382	0.14894	65503519	0	0.1	0.149949
LG20	1695000	0.521103	0.324503	1.60585	0.1966	6.91119e+07	0	0.200018	0.24994
LG20	1735000	0.634202	0.393031	1.61362	0.241171	71651482	0	0.249913	0.250034
LG20	1745000	0.430107	0.275277	1.56245	0.15483	65276162	0	0.149996	0.150072
LG20	2285000	0.344366	0.174428	1.97426	0.169938	73201695	0	0.199944	0.199985
LG20	2305000	0.688506	0.357454	1.92614	0.331052	7.86754e+07	0	0.350043	0.350024
LG20	2315000	0.55223	0.252165	2.18996	0.300065	7.54125e+07	0	0.299947	0.300008
LG20	2345000	0.527667	0.198635	2.65646	0.329032	81486111	0	0.350025	0.350042
LG20	2355000	0.59647	0.24751	2.40988	0.34896	8.08181e+07	0	0.399997	0.400006
LG20	2685000	0.44701	0.260414	1.71654	0.186596	6.93666e+07	0	0.200048	0.200028
LG20	2865000	0.709864	0.362239	1.95966	0.347625	7.73323e+07	0	0.350008	0.399939
LG20	3295000	0.29556	0.120893	2.44481	0.174668	71874949	0	0.149932	0.150069
LG20	3415000	0.475177	0.24554	1.93523	0.229637	7.75655e+07	0	0.249992	0.249952
LG20	3425000	0.539071	0.300765	1.79233	0.238306	6.89222e+07	0	0.199984	0.200018
LG20	4265000	0.75053	0.411164	1.82538	0.339366	7.38136e+07	0	0.349994	0.350003
LG20	5635000	0.925982	0.577432	1.60362	0.34855	75478742	0	0.350019	0.39995
LG20	13425000	0.634887	0.323703	1.96133	0.311184	81638776	0	0.300007	0.349913
LG20	13435000	0.320103	0.0519298	6.16415	0.268173	8.69944e+07	0	0.250027	0.250019
LG20	13445000	0.293966	0.0617088	4.76375	0.232257	8.63808e+07	0	0.200035	0.200063
LG20	13475000	0.543801	0.318448	1.70766	0.225352	70441456	0	0.249993	0.250058
LG20	26365000	0.49601	0.29663	1.67215	0.19938	70666185	0	0.249966	0.249965
LG22	1395000	0.515554	0.0921408	5.59529	0.423413	90249546	0	0.388863	0.38885
LG22	1405000	0.724289	0.275467	2.62931	0.448822	83301842	0	0.499931	0.500018
LG22	2995000	0.354809	0.133131	2.66511	0.221678	6.87025e+07	0	0.166643	0.166726
LG22	3015000	0.395238	0.152757	2.58737	0.242481	76883817	0	0.222192	0.222254
LG22	3035000	0.294904	0.120621	2.44487	0.174283	7.61664e+07	0	0.166663	0.166667
LG23	9535000	0.475619	0.245537	1.93706	0.230083	72591076	0	0.222222	0.222239

## Sheet: ChitiliRiverCh1_F
Linkage_Group	pos	FmedianNormalWind	MmedianNormalWind	ratiomedianNormWind_FM	differenceNormWind_FM	Wilcox_statist	Wilcox_p_value	Wilcox_confint1	Wilcox_confint2
LG01	30045000	0.770537	0.317324	2.42823	0.453213	#N/A	#N/A	#N/A	#N/A
LG02	10965000	0.376012	0.234588	1.60287	0.141425	67558395	0	0.141404	0.156542
LG02	18255000	0.628178	0.273367	2.29793	0.354811	7.55863e+07	0	0.363662	0.393967
LG02	18305000	0.355701	0.184737	1.92544	0.170964	6.81664e+07	0	0.136408	0.156491
LG02	18345000	0.495769	0.0159095	31.1618	0.479859	87641834	0	0.499958	0.500018
LG02	18355000	0.622438	0.355348	1.75163	0.26709	6.72875e+07	0	0.27274	0.318133
LG02	18545000	0.559062	0.285933	1.95522	0.27313	7.41831e+07	0	0.282831	0.308033
LG02	18635000	0.596322	0.353687	1.68602	0.242635	6.34942e+07	2.20766e-242	0.156524	0.181843
LG02	19275000	0.860882	0.489068	1.76025	0.371814	79826663	0	0.373818	0.393996
LG02	19285000	0.62297	0.18146	3.4331	0.44151	90668052	0	0.449428	0.459604
LG02	19295000	0.735136	0.326906	2.24877	0.408229	8.44328e+07	0	0.434387	0.449504
LG02	19485000	0.520003	0.114144	4.55567	0.405858	8.81532e+07	0	0.434403	0.444448
LG02	19495000	0.649362	0.27039	2.40158	0.378973	8.39161e+07	0	0.399005	0.4091
LG02	19525000	0.58366	0.176071	3.31491	0.407589	84704951	0	0.414197	0.439407
LG02	20925000	0.738976	0.0928074	7.96247	0.646169	9.63664e+07	0	0.671641	0.681738
LG02	20935000	0.46129	0.176166	2.6185	0.285125	77308029	0	0.313169	0.318197
LG03	7435000	0.636765	0.0473536	13.447	0.589411	8.92999e+07	0	0.571502	0.642844
LG03	7445000	0.52719	0.0119488	44.1207	0.515241	9.71272e+07	0	0.428583	0.428616
LG03	21435000	0.764281	0.138686	5.51087	0.625595	7.77749e+07	0	0.642826	0.642897
LG03	21445000	0.576471	0.0823168	7.00308	0.494154	85574177	0	0.499952	0.500058
LG03	22195000	0.30237	0.00719095	42.0487	0.295179	86843637	0	0.214301	0.214329
LG03	22205000	0.283086	0.0089991	31.4571	0.274087	7.54256e+07	0	0.0714408	0.142841
LG03	22875000	1.0059	0.179049	5.61802	0.826851	90147173	0	0.916642	0.928562
LG03	22885000	0.807169	0.0320385	25.1938	0.775131	95490353	0	0.785696	0.785756
LG03	22895000	0.828439	0.0093824	88.2971	0.819056	9.86403e+07	0	0.785742	0.785779
LG03	23385000	0.534918	0.0878829	6.08671	0.447035	81692964	0	0.428512	0.428528
LG03	23735000	0.641093	0.0611189	10.4893	0.579974	8.13294e+07	0	0.357159	0.428513
LG03	23745000	0.318482	0.0183148	17.3893	0.300168	7.58873e+07	0	0.14281	0.142876
LG03	25515000	0.353272	0.0345715	10.2186	0.3187	90256332	0	0.28568	0.285774
LG03	25525000	0.414951	0.0511865	8.10665	0.363765	91211019	0	0.35713	0.35707
LG03	25565000	0.29717	0.053178	5.58822	0.243992	7.83022e+07	0	0.142834	0.142948
LG03	25575000	0.638965	0.0960821	6.6502	0.542883	88599982	0	0.571457	0.642816
LG03	25965000	0.287614	0.043179	6.66097	0.244435	72391493	0	0.0714423	0.142817
LG03	27725000	0.284786	0.0447955	6.35746	0.23999	87270539	0	0.214337	0.214308
LG03	28405000	0.297942	0.053753	5.5428	0.244189	84074095	0	0.214311	0.214326
LG04	9675000	0.909824	0.377679	2.40899	0.532145	8.75348e+07	0	0.566694	0.577802
LG04	9815000	0.743191	0.0740315	10.0388	0.669159	9.82645e+07	0	0.694468	0.699971
LG04	13135000	0.476192	0.000238865	1993.56	0.475954	#N/A	#N/A	#N/A	#N/A
LG04	13145000	0.513334	0.00796032	64.4866	0.505373	#N/A	#N/A	#N/A	#N/A
LG04	13155000	0.535151	0.00025553	2094.28	0.534896	#N/A	#N/A	#N/A	#N/A
LG04	14795000	0.494851	0.174055	2.84307	0.320796	#N/A	#N/A	#N/A	#N/A
LG04	14805000	0.433207	0.146813	2.95074	0.286394	#N/A	#N/A	#N/A	#N/A
LG04	14835000	0.388291	0.111717	3.47568	0.276575	#N/A	#N/A	#N/A	#N/A
LG04	14845000	0.466633	0.147313	3.16763	0.31932	#N/A	#N/A	#N/A	#N/A
LG05	2055000	0.388225	0.225472	1.72183	0.162753	6.95973e+07	0	0.171714	0.181731
LG05	2105000	0.275845	0.16044	1.71931	0.115406	61826470	6.28878e-212	4.34815e-05	0.015235
LG05	2135000	0.466967	0.244848	1.90717	0.222119	68983619	0	0.20707	0.227303
LG05	2385000	0.548104	0.245231	2.23505	0.302873	73040222	0	0.227308	0.242482
LG05	2395000	0.583519	0.226855	2.57221	0.356664	81041895	0	0.358567	0.368657
LG05	2545000	0.611366	0.370613	1.64961	0.240753	6.68858e+07	0	0.196894	0.227233
LG05	2555000	0.678141	0.367313	1.84622	0.310828	7.56592e+07	0	0.303061	0.32318
LG05	2875000	0.762451	0.323312	2.35825	0.439139	8.60744e+07	0	0.449449	0.464702
LG06	3275000	0.468943	0.235249	1.99339	0.233694	7.30713e+07	0	0.238869	0.24992
LG06	7055000	0.291916	0.0472897	6.17292	0.244626	9.13633e+07	0	0.200055	0.20003
LG06	7095000	0.289176	0.0900466	3.21141	0.19913	8.67575e+07	0	0.199969	0.199933
LG06	24735000	0.726682	0.373624	1.94496	0.353059	7.54976e+07	0	0.344475	0.366692
LG07	29125000	0.563312	0.26974	2.08835	0.293572	72251007	0	0.27775	0.313165
LG07	30945000	0.348483	0.158729	2.19547	0.189755	79416638	0	0.227247	0.2273
LG07	30995000	0.567652	0.29371	1.9327	0.273943	7.59193e+07	0	0.28283	0.302984
LG07	31005000	0.611289	0.391333	1.56207	0.219956	62962245	3.24892e-222	0.181835	0.212143
LG07	31015000	0.52772	0.206863	2.55106	0.320857	7.91514e+07	0	0.32834	0.363636
LG07	31075000	0.272573	0.161234	1.69054	0.111339	69982303	0	0.126209	0.136342
LG07	53565000	0.801329	0.458915	1.74614	0.342414	7.19481e+07	0	0.383798	0.40909
LG08	5325000	0.629764	0.252691	2.49223	0.377073	80230797	0	0.393994	0.41412
LG08	5345000	0.710165	0.428435	1.65758	0.28173	70251581	0	0.302989	0.318229
LG08	5355000	0.426448	0.190498	2.2386	0.235951	72401186	0	0.181896	0.186874
LG08	5365000	0.652489	0.428579	1.52245	0.22391	65887174	0	0.22733	0.252539
LG08	21275000	0.347461	0.164306	2.11472	0.183155	72098821	0	0.181781	0.181881
LG09	1875000	0.676202	0.306469	2.20643	0.369733	7.24841e+07	0	0.361087	0.388843
LG09	1915000	0.263494	0.119194	2.21064	0.1443	67504276	0	0.0944694	0.0999696
LG09	1945000	0.597645	0.113189	5.28008	0.484457	93055396	0	0.494415	0.499964
LG09	1955000	0.275292	0.092513	2.97572	0.182779	76848208	0	0.177727	0.188867
LG09	8385000	0.482277	0.0944017	5.10877	0.387875	8.83826e+07	0	0.400083	0.427721
LG10	14245000	0.588437	0.183282	3.21056	0.405155	86075292	0	0.424198	0.434345
LG10	19965000	0.71821	0.402804	1.78303	0.315406	76165013	0	0.333287	0.353472
LG10	21875000	0.857578	0.526103	1.63006	0.331475	7.35813e+07	0	0.343384	0.363685
LG10	22115000	0.798266	0.528997	1.50902	0.269269	68269199	0	0.297978	0.318209
LG11	18465000	1.1433	0.591663	1.93235	0.551638	87114150	0	0.583306	0.605599
LG11	18525000	1.09856	0.531936	2.06521	0.566624	8.74719e+07	0	0.577802	0.599967
LG11	19195000	0.841466	0.431357	1.95074	0.410109	#N/A	#N/A	#N/A	#N/A
LG11	19205000	0.675287	0.301075	2.24292	0.374212	#N/A	#N/A	#N/A	#N/A
LG11	19225000	0.305684	0.164784	1.85507	0.140901	#N/A	#N/A	#N/A	#N/A
LG11	19235000	0.307139	0.0923297	3.32655	0.21481	#N/A	#N/A	#N/A	#N/A
LG11	19275000	0.521668	0.251153	2.07709	0.270515	#N/A	#N/A	#N/A	#N/A
LG12	24085000	0.520021	0.232727	2.23447	0.287294	79077929	0	0.313086	0.318204
LG12	25485000	0.780658	0.365625	2.13514	0.415034	79215810	0	0.424206	0.444508
LG12	26495000	0.713942	0.260418	2.74152	0.453524	85842876	0	0.469673	0.484851
LG12	29995000	0.272455	0.111528	2.44293	0.160927	70471543	0	0.0959429	0.136314
LG13	1965000	0.541241	0.368802	1.46757	0.172439	66569937	0	0.181861	0.201979
LG13	1975000	0.302442	0.0539835	5.6025	0.248459	8.66929e+07	0	0.227214	0.22732
LG13	3185000	0.688645	0.483424	1.42452	0.205221	6.54843e+07	0	0.20707	0.227263
LG13	3935000	0.464608	0.187676	2.47559	0.276932	77172508	0	0.247459	0.262582
LG13	5675000	0.369327	0.254297	1.45235	0.11503	73207436	0	0.181762	0.181872
LG13	23085000	0.38223	0.263835	1.44875	0.118395	6.7822e+07	0	0.136343	0.136407
LG14	6385000	0.435897	0.22635	1.92577	0.209548	7.35622e+07	0	0.232281	0.257569
LG14	14925000	0.923439	0.587208	1.57259	0.336232	75360622	0	0.348466	0.363655
LG14	17535000	0.450932	0.269717	1.67187	0.181215	68251853	0	0.181879	0.212103
LG15	5000	0.398609	0.180072	2.21361	0.218537	7.53571e+07	0	0.222176	0.227331
LG15	8065000	0.337948	0.0691653	4.88609	0.268783	8.4316e+07	0	0.277757	0.308064
LG15	25945000	0.351583	0.128143	2.74368	0.22344	7.28061e+07	0	0.186885	0.207082
LG15	25955000	0.446601	0.230427	1.93814	0.216174	72728063	0	0.217211	0.232309
LG15	25965000	0.404537	0.153768	2.63083	0.250769	7.51162e+07	0	0.272766	0.297971
LG15	25975000	0.41524	0.00917686	45.2486	0.406063	9.72507e+07	0	0.409065	0.409122
LG15	25985000	0.269414	0.111817	2.40943	0.157597	69604995	0	0.0909526	0.106075
LG16	21375000	0.401214	0.21369	1.87756	0.187525	73429431	0	0.18176	0.186848
LG17	4175000	1.03508	0.608311	1.70157	0.42677	75420157	0	0.422288	0.449975
LG17	15665000	0.943411	0.473169	1.99381	0.470241	82804339	0	0.516613	0.533323
LG17	15675000	0.720998	0.415603	1.73482	0.305395	74986583	0	0.311158	0.333287
LG17	24345000	0.786451	0.310352	2.53406	0.476099	79802107	0	0.550026	0.588904
LG18	17945000	0.316748	0.133559	2.3716	0.183189	#N/A	#N/A	#N/A	#N/A
LG18	17965000	0.252145	0.0878468	2.87028	0.164298	#N/A	#N/A	#N/A	#N/A
LG18	24885000	0.29646	0.115111	2.57544	0.18135	#N/A	#N/A	#N/A	#N/A
LG18	26875000	0.319958	0.126926	2.52082	0.193032	#N/A	#N/A	#N/A	#N/A
LG18	27955000	0.327072	0.0727261	4.49732	0.254346	#N/A	#N/A	#N/A	#N/A
LG19	355000	0.29624	0.139697	2.12059	0.156543	6.94564e+07	0	0.133391	0.149973
LG19	1645000	0.430302	0.24832	1.73286	0.181982	64655452	2.20232e-296	0.177808	0.199983
LG19	14595000	0.463314	0.234904	1.97235	0.228409	6.99408e+07	0	0.238849	0.250032
LG19	14625000	0.616263	0.212645	2.89808	0.403618	80573329	0	0.433339	0.45006
LG19	17615000	0.7486	0.158156	4.73329	0.590444	94269477	0	0.638837	0.64449
LG19	17715000	0.59749	0.34541	1.7298	0.25208	68635462	0	0.233376	0.25006
LG19	18755000	0.620758	0.319829	1.9409	0.300929	72316027	0	0.294375	0.299967
LG19	24425000	0.451385	0.199974	2.25721	0.25141	74041287	0	0.250046	0.283285
LG19	24435000	0.407539	0.0518337	7.86244	0.355706	89060782	0	0.300065	0.300041
LG20	1785000	0.422917	0.141758	2.98337	0.281159	83061496	0	0.27265	0.272746
LG20	3275000	0.488488	0.140353	3.48043	0.348135	79996670	0	0.323244	0.358605
LG20	3335000	0.473866	0.298254	1.5888	0.175613	67435977	0	0.17181	0.18691
LG20	4305000	0.643686	0.428129	1.50348	0.215556	66408513	0	0.257504	0.277762
LG20	13435000	0.577374	0.384034	1.50345	0.19334	#N/A	#N/A	#N/A	#N/A
LG20	13445000	0.442788	0.0447455	9.89568	0.398042	#N/A	#N/A	#N/A	#N/A
LG20	13455000	0.583101	0.165283	3.52788	0.417817	#N/A	#N/A	#N/A	#N/A
LG20	13475000	0.476611	0.0840194	5.67264	0.392592	#N/A	#N/A	#N/A	#N/A
LG20	16725000	0.674292	0.410365	1.64315	0.263927	#N/A	#N/A	#N/A	#N/A
LG23	9415000	0.568213	0.310341	1.83093	0.257872	7.13234e+07	0	0.288834	0.305595
LG23	9425000	0.508699	0.268923	1.89162	0.239776	7.29597e+07	0	0.233374	0.244519
LG23	13675000	0.692456	0.295865	2.34045	0.396591	7.85039e+07	0	0.416663	0.44447
LG23	17905000	0.40486	0.172244	2.3505	0.232616	68119665	0	0.172283	0.199991
LG23	17915000	0.691861	0.351632	1.96757	0.340229	73971314	0	0.327838	0.349943
LG23	18765000	0.322043	0.172716	1.86458	0.149327	6.2768e+07	1.59769e-216	0.0944109	0.100093
LG23	18775000	0.313654	0.131776	2.38021	0.181878	65588704	0	0.100091	0.122175
LG23	18795000	0.641111	0.245309	2.61349	0.395802	78834791	0	0.422204	0.438894
LG23	18805000	0.771103	0.265901	2.89996	0.505202	86831789	0	0.500032	0.533308
LG23	18815000	0.90137	0.422969	2.13106	0.478401	76486640	0	0.488847	0.500061
LG23	18825000	0.690981	0.286794	2.40933	0.404187	79118141	0	0.416704	0.438906
LG23	25045000	0.338301	0.145297	2.32835	0.193005	71771205	0	0.150048	0.183329
LG23	25075000	0.506454	0.146341	3.46078	0.360113	8.04156e+07	0	0.350017	0.383354
LG23	25155000	0.490541	0.232821	2.10694	0.25772	81092437	0	0.250043	0.299952
LG23	27445000	0.544696	0.285988	1.90461	0.258707	74864698	0	0.300047	0.327801

## Sheet: KalamboLakeKaL_F
Linkage_Group	pos	FmedianNormalWind	MmedianNormalWind	ratiomedianNormWind_FM	differenceNormWind_FM	Wilcox_statist	Wilcox_p_value	Wilcox_confint1	Wilcox_confint2
LG02	10965000	0.645535	0.401868	1.60634	0.243667	6.40383e+07	1.46178e-261	0.249953	0.249964
LG02	19825000	0.803645	0.467687	1.71834	0.335958	7.07459e+07	0	0.333331	0.333344
LG02	21215000	0.503666	0.259224	1.94298	0.244442	7.31471e+07	0	0.250012	0.25004
LG03	23195000	0.265448	0.0161817	16.4042	0.249267	7.90986e+07	0	0.12504	0.125005
LG03	27385000	0.544533	0.0385961	14.1085	0.505937	82142281	0	0.499973	0.49999
LG05	625000	0.77034	0.460304	1.67355	0.310036	7.39963e+07	0	0.333296	0.33336
LG05	2535000	0.507224	0.308694	1.64313	0.19853	6.52538e+07	1.40239e-307	0.166609	0.166719
LG05	2545000	0.593916	0.361156	1.64449	0.23276	62246002	3.37511e-200	0.166681	0.166686
LG05	2695000	0.414367	0.244726	1.69319	0.169641	64849666	1.88398e-293	0.0833576	0.166629
LG06	15945000	0.628279	0.328109	1.91485	0.30017	72455503	0	0.333328	0.333316
LG06	20935000	0.698772	0.352323	1.98333	0.346449	77949477	0	0.333348	0.416616
LG06	20955000	0.473844	0.133703	3.544	0.340141	84825097	0	0.333342	0.333382
LG06	23435000	0.46227	0.238251	1.94027	0.224019	71923770	0	0.249977	0.250022
LG06	29775000	0.560861	0.209487	2.6773	0.351373	7.97742e+07	0	0.333426	0.333378
LG06	29825000	0.269981	0.137186	1.96799	0.132795	70548943	0	0.166611	0.166601
LG07	30645000	0.264215	0.145477	1.8162	0.118738	64766692	2.93458e-306	0.0832913	0.0833643
LG07	50525000	0.659976	0.439514	1.5016	0.220461	64240041	2.16269e-268	0.166702	0.166706
LG07	53545000	0.712254	0.46342	1.53695	0.248833	67939378	0	0.25004	0.250025
LG07	53555000	0.54887	0.268381	2.04511	0.280489	7.67427e+07	0	0.250006	0.333286
LG08	1515000	0.323526	0.184615	1.75244	0.138911	65650090	0	0.0833501	0.166653
LG08	13825000	0.728602	0.434098	1.67843	0.294504	76797919	0	0.333283	0.333294
LG08	13835000	0.750267	0.482493	1.55498	0.267773	7.29851e+07	0	0.250027	0.25002
LG08	18485000	0.540496	0.345682	1.56356	0.194814	6.5081e+07	2.14139e-301	0.166669	0.16667
LG09	315000	0.791021	0.389801	2.02929	0.40122	7.63353e+07	0	0.400023	0.416736
LG09	635000	0.264707	0.130727	2.02488	0.13398	64914610	0	0.0833	0.0832726
LG09	2805000	0.593582	0.306009	1.93975	0.287573	7.70271e+07	0	0.283334	0.300078
LG10	4375000	0.633303	0.405726	1.56091	0.227577	6.27883e+07	1.85904e-217	0.166735	0.249961
LG10	26495000	0.301686	0.188648	1.5992	0.113039	61004380	3.6262e-166	0.0833006	0.0833483
LG10	26835000	0.654993	0.244259	2.68155	0.410734	8.13859e+07	0	0.416702	0.499975
LG12	21245000	0.692322	0.315377	2.19522	0.376946	77358096	0	0.416647	0.41675
LG12	21305000	0.39961	0.172524	2.31625	0.227086	68410517	0	0.166591	0.166715
LG12	29655000	0.26689	0.111014	2.40411	0.155876	63921162	4.20746e-279	0.0833227	0.0832939
LG12	29855000	0.283822	0.0546195	5.19634	0.229202	8.33464e+07	0	0.166706	0.166679
LG12	29875000	0.400402	0.178582	2.24211	0.221819	7.18822e+07	0	0.16668	0.166693
LG13	1925000	0.395385	0.21207	1.86441	0.183315	66045003	0	0.1666	0.166698
LG13	2045000	0.45188	0.242476	1.86361	0.209404	7.20041e+07	0	0.16672	0.249975
LG13	3705000	0.969253	0.65036	1.49033	0.318893	73244592	0	0.333268	0.333342
LG13	7005000	1.06943	0.763399	1.40088	0.306028	70797191	0	0.333378	0.333349
LG14	12575000	0.65496	0.4134	1.58432	0.241559	60702701	1.76314e-154	0.166641	0.166587
LG14	17295000	0.798254	0.467712	1.70672	0.330542	66660930	0	0.333325	0.333365
LG15	8595000	0.432123	0.240734	1.79502	0.191389	68240782	0	0.166718	0.166715
LG15	12475000	0.599282	0.308802	1.94066	0.290479	77848884	0	0.333328	0.333289
LG15	12495000	0.438789	0.213812	2.05222	0.224978	72736836	0	0.249979	0.249984
LG15	17565000	0.677866	0.414334	1.63604	0.263532	6.74559e+07	0	0.249954	0.250008
LG15	26755000	0.737626	0.456596	1.61549	0.28103	72013629	0	0.333325	0.333327
LG16	3105000	0.803745	0.151452	5.30694	0.652293	94619267	0	0.666708	0.666701
LG16	3115000	0.472161	0.151868	3.10902	0.320293	7.83462e+07	0	0.250038	0.333304
LG16	16165000	0.656234	0.310002	2.11687	0.346232	7.1634e+07	0	0.250048	0.250037
LG16	23695000	0.302211	0.168708	1.79133	0.133503	6.66682e+07	0	0.0833856	0.0833684
LG17	21295000	0.740776	0.419141	1.76737	0.321635	7.3546e+07	0	0.333281	0.333297
LG17	22235000	0.419658	0.212229	1.97739	0.207429	7.5411e+07	0	0.250051	0.250005
LG18	25625000	0.556053	0.243142	2.28694	0.31291	7.17111e+07	0	0.333327	0.333287
LG19	5795000	0.524798	0.0193897	27.0657	0.505408	95047469	0	0.500016	0.500007
LG19	5805000	0.425382	0.05042	8.43679	0.374963	89423719	0	0.333358	0.416603
LG19	16005000	0.88167	0.487393	1.80895	0.394277	7.43828e+07	0	0.416715	0.416714
LG19	16015000	0.690948	0.349415	1.97744	0.341533	7.71167e+07	0	0.416594	0.416646
LG19	24315000	0.513015	0.260816	1.96697	0.2522	69279070	0	0.249997	0.25004
LG19	24605000	0.637395	0.356498	1.78793	0.280897	74580178	0	0.250058	0.333322
LG19	24685000	0.68734	0.326217	2.107	0.361122	7.94001e+07	0	0.333362	0.416592
LG19	25105000	0.926699	0.545087	1.70009	0.381612	7.35539e+07	0	0.333384	0.416595
LG19	25115000	0.573868	0.240618	2.38498	0.33325	77719375	0	0.333254	0.333312
LG19	25135000	0.76184	0.355206	2.14478	0.406634	79493325	0	0.416705	0.416744
LG19	25145000	0.875862	0.392377	2.23219	0.483485	78569382	0	0.500012	0.583242
LG20	1165000	0.64571	0.392236	1.64623	0.253475	6.75886e+07	0	0.249955	0.250028
LG20	1285000	0.738751	0.480794	1.53652	0.257958	6.60248e+07	0	0.249938	0.25007
LG20	1295000	0.937323	0.587383	1.59576	0.34994	75551162	0	0.3334	0.333366
LG20	1665000	0.487876	0.289754	1.68376	0.198122	61159605	3.86911e-170	0.0833883	0.0833496
LG20	1725000	0.432673	0.258124	1.67622	0.174549	6.71055e+07	0	0.166741	0.16672
LG20	1735000	0.635428	0.1713	3.70946	0.464129	8.10019e+07	0	0.49997	0.499996
LG20	1755000	1.05975	0.56756	1.86721	0.492192	77152379	0	0.583256	0.583344
LG20	2825000	1.04955	0.685298	1.53152	0.364247	7.23389e+07	0	0.333421	0.416604
LG20	3185000	0.285246	0.170691	1.67113	0.114555	64298066	2.96055e-282	0.0833511	0.0833564
LG20	21855000	1.10055	0.720053	1.52843	0.380495	78939503	0	0.416663	0.416635
LG20	25985000	1.01189	0.470961	2.14856	0.540929	85314137	0	0.583305	0.58325
LG20	25995000	0.957363	0.533438	1.7947	0.423924	77384401	0	0.499978	0.500034
LG20	26005000	0.766415	0.378179	2.02659	0.388236	74677407	0	0.41669	0.416681
LG20	26015000	1.04495	0.464445	2.2499	0.580509	8.27133e+07	0	0.583406	0.583375
LG23	9185000	0.393627	0.151102	2.60505	0.242526	7.95433e+07	0	0.249996	0.249988
LG23	9775000	0.386436	0.138978	2.78056	0.247459	7.30846e+07	0	0.166678	0.249945
LG23	9805000	0.329084	0.175474	1.8754	0.15361	68099645	0	0.166636	0.166657
LG23	18215000	0.643327	0.350473	1.8356	0.292854	7.53399e+07	0	0.333318	0.333253
LG23	20955000	0.762115	0.40031	1.90381	0.361805	7.63517e+07	0	0.416657	0.416675

## Sheet: KalamboRiverKa1_F
Linkage_Group	pos	FmedianNormalWind	MmedianNormalWind	ratiomedianNormWind_FM	differenceNormWind_FM	Wilcox_statist	Wilcox_p_value	Wilcox_confint1	Wilcox_confint2
LG02	10565000	0.652151	0.383062	1.70247	0.26909	7.05393e+07	0	0.250041	0.277822
LG02	10825000	0.348657	0.191348	1.82211	0.157309	6.54628e+07	0	0.11105	0.13885
LG02	18125000	0.774264	0.327801	2.362	0.446464	7.99185e+07	0	0.416733	0.444498
LG02	18145000	0.603781	0.154785	3.90079	0.448997	85124528	0	0.444496	0.472281
LG02	18225000	0.380154	0.219034	1.73559	0.16112	64189817	1.06566e-268	0.111157	0.138907
LG02	18275000	0.252183	0.1087	2.31999	0.143483	6.4229e+07	1.66169e-307	0.0555336	0.0833119
LG02	20215000	0.469145	0.280294	1.67376	0.188851	69037294	0	0.249986	0.250042
LG02	20495000	0.423958	0.0998678	4.24519	0.32409	8.33997e+07	0	0.33332	0.333317
LG02	20655000	0.763865	0.358553	2.13041	0.405312	76244099	0	0.388801	0.416636
LG02	26315000	0.788296	0.430979	1.82908	0.357317	7.22453e+07	0	0.416629	0.416725
LG03	645000	0.527635	0.100407	5.25498	0.427228	79005060	0	0.37498	0.374978
LG03	15635000	1.01681	0.176899	5.74797	0.839912	9.18293e+07	0	0.874975	0.875011
LG03	15655000	1.42266	0.17085	8.32696	1.25181	9.83744e+07	0	1.20834	1.24998
LG03	20985000	0.553657	0.0893077	6.19943	0.464349	7.86905e+07	0	0.291725	0.37495
LG03	23355000	0.671183	0.0372463	18.0201	0.633937	90223942	0	0.50007	0.58331
LG03	23365000	0.57198	0.0508949	11.2385	0.521085	9.02964e+07	0	0.499964	0.499951
LG03	23375000	0.631062	0.0785921	8.02958	0.55247	9.15885e+07	0	0.500005	0.500071
LG03	24965000	0.600627	0.0713262	8.42085	0.529301	8.88879e+07	0	0.499978	0.500034
LG03	25005000	0.433844	0.0207479	20.9102	0.413096	8.65688e+07	0	0.374967	0.375023
LG03	25075000	0.358089	0.0431457	8.29954	0.314944	7.8904e+07	0	0.249945	0.249962
LG03	25305000	0.780122	0.0790421	9.8697	0.70108	9.25205e+07	0	0.750061	0.750037
LG03	26055000	0.609777	0.069743	8.74319	0.540033	85038414	0	0.500024	0.541701
LG03	26075000	0.685469	0.0806419	8.50015	0.604827	91183882	0	0.625011	0.666663
LG03	27155000	0.676495	0.0236476	28.6073	0.652847	9.49188e+07	0	0.624965	0.625049
LG03	27185000	0.348853	0.0544946	6.40161	0.294358	78402560	0	0.249965	0.249953
LG03	27195000	0.560444	0.0281972	19.8759	0.532247	8.88241e+07	0	0.500029	0.500047
LG03	27665000	0.877237	0.1638	5.35553	0.713437	8.76967e+07	0	0.75004	0.750013
LG03	27695000	0.876262	0.0404626	21.6561	0.8358	99199781	0	0.750003	0.79163
LG03	27725000	0.556444	0.10064	5.52906	0.455804	8.51844e+07	0	0.499962	0.49996
LG03	27765000	0.635161	0.0315635	20.1233	0.603598	89031189	0	0.500018	0.624999
LG03	27795000	0.701942	0.0646102	10.8643	0.637332	9.0866e+07	0	0.624957	0.625002
LG04	785000	0.894647	0.368041	2.43084	0.526606	84583108	0	0.515106	0.535347
LG04	9885000	0.65888	0.115744	5.69256	0.543136	8.99215e+07	0	0.545421	0.545509
LG04	9895000	0.50285	0.12862	3.90956	0.374229	8.19333e+07	0	0.393987	0.43434
LG04	9915000	0.540619	0.160484	3.36868	0.380135	81362810	0	0.343449	0.363604
LG04	9935000	0.56927	0.074037	7.68899	0.495233	86547513	0	0.45455	0.505094
LG04	9965000	0.413568	0.170516	2.42539	0.243051	7.49579e+07	0	0.232386	0.272683
LG04	9975000	0.422812	0.084436	5.00749	0.338376	8.19713e+07	0	0.272767	0.272785
LG04	9985000	0.488533	0.221467	2.2059	0.267066	6.63247e+07	0	0.17176	0.181849
LG04	10055000	0.340321	0.154462	2.20326	0.185858	69014428	0	0.161578	0.161635
LG04	13245000	0.617693	0.185881	3.32305	0.431811	83856008	0	0.454626	0.454568
LG04	13255000	0.54091	0.0245864	22.0003	0.516323	94177738	0	0.545434	0.545373
LG04	13265000	0.517003	0.0388072	13.3223	0.478196	92728913	0	0.454506	0.454519
LG04	13275000	0.273291	0.106823	2.55836	0.166468	66747377	0	0.0908766	0.0909601
LG04	15455000	0.86035	0.233443	3.68548	0.626907	89582116	0	0.636344	0.636408
LG04	25635000	0.73659	0.279105	2.63911	0.457485	8.277e+07	0	0.484831	0.504998
LG05	2605000	0.527829	0.323268	1.63279	0.204561	67882885	0	0.212114	0.232408
LG05	2665000	0.73459	0.423835	1.7332	0.310755	71876509	0	0.303022	0.323193
LG05	2675000	0.976857	0.602795	1.62054	0.374062	78824594	0	0.353538	0.373774
LG05	2725000	0.792057	0.35312	2.24302	0.438937	8.03151e+07	0	0.454521	0.464615
LG05	2735000	0.28728	0.141208	2.03445	0.146072	58669358	1.86608e-124	3.56163e-06	3.79318e-05
LG05	16775000	0.445565	0.269429	1.65374	0.176136	64355413	1.0715e-273	0.161671	0.181768
LG05	25315000	0.420276	0.246931	1.702	0.173345	5.91102e+07	1.13689e-114	0.0706754	0.0908676
LG06	155000	0.680832	0.313513	2.17162	0.367319	77901272	0	0.393922	0.424239
LG06	3125000	1.05557	0.510449	2.06792	0.545118	8.83761e+07	0	0.525293	0.5454
LG06	5085000	0.836571	0.374329	2.23485	0.462242	8.11765e+07	0	0.454593	0.484857
LG06	5315000	0.307887	0.134387	2.29106	0.173501	6.11056e+07	2.9644e-181	2.27068e-05	0.070685
LG06	5325000	0.445592	0.224222	1.98728	0.22137	6.92953e+07	0	0.181822	0.181839
LG06	6965000	0.723664	0.347799	2.0807	0.375865	75770836	0	0.373751	0.4141
LG06	16745000	0.75237	0.398582	1.88762	0.353788	69610772	0	0.363605	0.36365
LG06	16775000	0.983529	0.497417	1.97727	0.486112	7.97276e+07	0	0.484816	0.495003
LG06	23705000	0.746444	0.351343	2.12455	0.395101	7.781e+07	0	0.393889	0.41419
LG06	29525000	0.492596	0.242987	2.02725	0.249609	6.793e+07	0	0.181856	0.232341
LG06	29565000	0.875858	0.452088	1.93736	0.42377	7.74522e+07	0	0.414181	0.444406
LG07	1305000	0.509457	0.314269	1.62109	0.195189	6.49672e+07	1.44363e-296	0.166624	0.166681
LG07	2655000	1.02976	0.472642	2.17874	0.557122	8.86136e+07	0	0.5556	0.583288
LG07	3205000	1.00127	0.600718	1.66678	0.400549	7.70072e+07	0	0.416601	0.444428
LG07	7095000	0.777922	0.324379	2.39819	0.453544	8.32771e+07	0	0.500029	0.500017
LG07	7115000	0.887778	0.409392	2.16853	0.478385	79735822	0	0.500033	0.527799
LG07	7125000	1.22617	0.34761	3.52743	0.878559	93897190	0	0.916646	0.916686
LG07	7135000	1.07306	0.372707	2.8791	0.700352	87939183	0	0.749981	0.750052
LG07	7145000	1.00354	0.205502	4.88337	0.79804	95666917	0	0.833287	0.833373
LG07	7185000	0.655959	0.351287	1.8673	0.304672	6.9026e+07	0	0.250017	0.305483
LG07	7195000	0.96467	0.565932	1.70457	0.398738	76082072	0	0.416661	0.444422
LG07	30545000	0.644611	0.360731	1.78696	0.28388	67314849	0	0.277726	0.333298
LG07	30595000	0.593299	0.347865	1.70554	0.245434	6.95155e+07	0	0.249966	0.250047
LG07	42825000	0.841749	0.539368	1.56062	0.302381	74138759	0	0.361109	0.388804
LG07	47535000	0.713904	0.404404	1.76532	0.3095	7.34707e+07	0	0.333281	0.361068
LG08	7425000	0.483852	0.247731	1.95313	0.236121	63971668	1.2611e-266	0.138898	0.166691
LG08	13185000	0.603806	0.275261	2.19357	0.328545	7.35734e+07	0	0.333319	0.333358
LG08	14055000	0.369105	0.240098	1.53731	0.129007	6.27626e+07	6.79505e-217	0.111087	0.138861
LG08	14195000	0.544779	0.232999	2.33812	0.31178	7.33707e+07	0	0.25005	0.277726
LG08	14205000	0.48331	0.214312	2.25517	0.268998	7.56672e+07	0	0.249971	0.250027
LG08	22245000	0.423599	0.230977	1.83395	0.192622	6.89894e+07	0	0.166601	0.166736
LG09	675000	0.509585	0.197836	2.5758	0.31175	77780739	0	0.272729	0.272778
LG09	695000	0.685804	0.329178	2.08338	0.356626	7.70612e+07	0	0.353557	0.363656
LG09	705000	0.693876	0.326512	2.12512	0.367364	74929195	0	0.393846	0.414181
LG09	1805000	0.409332	0.212168	1.92928	0.197164	6.81615e+07	0	0.181807	0.181824
LG09	1935000	0.398342	0.173194	2.29998	0.225148	72298931	0	0.192011	0.232364
LG09	1945000	0.43193	0.176382	2.44882	0.255547	74605682	0	0.252501	0.27269
LG09	1975000	0.263156	0.121432	2.1671	0.141723	63343999	2.9257e-255	0.0707793	0.0908444
LG09	2025000	0.299116	0.100534	2.97526	0.198581	7.07817e+07	0	0.0909283	0.141448
LG09	2045000	0.567261	0.151785	3.73727	0.415477	84056532	0	0.45454	0.454565
LG09	2165000	0.669797	0.294193	2.27673	0.375604	74557211	0	0.302986	0.323246
LG09	2825000	0.436665	0.0986679	4.42561	0.337998	76122060	0	0.272667	0.272739
LG09	2835000	0.629164	0.180293	3.48968	0.448871	87146273	0	0.454579	0.464627
LG09	2845000	0.59205	0.243953	2.4269	0.348097	77908399	0	0.323179	0.343417
LG09	8225000	0.52562	0.270429	1.94366	0.255192	7.24855e+07	0	0.252555	0.272706
LG09	12485000	0.66157	0.32539	2.03316	0.336181	7.08388e+07	0	0.333287	0.343448
LG09	16875000	0.508704	0.182126	2.79314	0.326577	80592570	0	0.363623	0.363598
LG10	12615000	0.871358	0.521248	1.67168	0.35011	72095224	0	0.383744	0.41408
LG10	12625000	0.769496	0.461632	1.6669	0.307864	72698146	0	0.292946	0.323177
LG10	15925000	0.582369	0.350698	1.6606	0.231671	67598239	0	0.232331	0.252572
LG10	16425000	0.557572	0.29857	1.86747	0.259001	75248766	0	0.272764	0.282886
LG10	17685000	0.718719	0.280216	2.56487	0.438503	7.33968e+07	0	0.383822	0.414104
LG10	17695000	0.683495	0.452355	1.51097	0.231141	62614025	2.69525e-210	0.181827	0.212161
LG10	17755000	0.264528	0.152885	1.73025	0.111643	61346232	8.73622e-183	0.0707564	0.0908505
LG10	17775000	0.51733	0.254008	2.03667	0.263322	7.62852e+07	0	0.262579	0.272774
LG10	24755000	1.0473	0.688876	1.5203	0.35842	75119276	0	0.363655	0.38385
LG10	25935000	0.691195	0.328956	2.10118	0.362239	75519811	0	0.54541	0.5454
LG10	25945000	0.598704	0.0285749	20.9521	0.570129	9.51576e+07	0	0.545466	0.616205
LG10	25955000	0.506486	0.134609	3.76265	0.371877	81541793	0	0.363643	0.434324
LG10	25965000	0.510649	0.280494	1.82053	0.230155	68963171	0	0.232272	0.252504
LG10	25975000	0.84837	0.561877	1.50988	0.286493	68414525	0	0.262566	0.282837
LG10	26225000	0.585705	0.213223	2.74691	0.372482	8.04903e+07	0	0.454521	0.454498
LG10	26235000	0.518266	0.086958	5.95996	0.431308	8.96849e+07	0	0.454572	0.454614
LG10	26245000	0.56608	0.277139	2.04258	0.288941	74004373	0	0.27276	0.282911
LG10	26255000	0.903273	0.505249	1.78778	0.398024	77725749	0	0.434325	0.45454
LG10	26265000	1.01447	0.654901	1.54904	0.35957	65186410	6.56261e-303	0.323145	0.353551
LG10	26405000	0.483733	0.317057	1.5257	0.166676	6.60569e+07	0	0.181842	0.191946
LG10	26485000	0.701657	0.383239	1.83086	0.318418	71335601	0	0.343394	0.363614
LG10	26505000	0.673796	0.305069	2.20866	0.368727	7.75541e+07	0	0.363626	0.363683
LG10	26515000	0.549509	0.362342	1.51655	0.187167	67834896	0	0.191887	0.212125
LG10	26535000	0.3602	0.227622	1.58245	0.132579	60330085	5.65172e-143	0.0808215	0.0909087
LG10	26765000	0.469944	0.30988	1.51653	0.160064	65902257	0	0.161564	0.171727
LG10	26995000	0.857469	0.511938	1.67495	0.345531	7.11283e+07	0	0.34345	0.363637
LG11	18965000	0.54021	0.246631	2.19036	0.293579	7.47774e+07	0	0.272718	0.272769
LG11	18975000	0.544973	0.266173	2.04744	0.278799	7.30908e+07	0	0.262662	0.272759
LG11	19015000	0.260156	0.0917131	2.83663	0.168443	6.94114e+07	0	2.01329e-05	4.06689e-05
LG11	19025000	0.310996	0.0584164	5.32378	0.25258	79412257	0	0.181819	0.181868
LG11	22485000	0.754215	0.235121	3.20778	0.519095	89283184	0	0.484852	0.51515
LG11	22505000	0.528193	0.174171	3.0326	0.354021	79219809	0	0.34341	0.363588
LG11	22515000	0.661943	0.241676	2.73897	0.420267	80270311	0	0.393889	0.434287
LG11	22545000	0.79542	0.425791	1.8681	0.36963	74240226	0	0.363654	0.393916
LG11	23385000	0.433702	0.238509	1.81839	0.195193	7.23705e+07	0	0.232311	0.242396
LG12	22605000	0.566843	0.244276	2.32051	0.322568	75381361	0	0.282832	0.323291
LG12	28865000	0.550636	0.186526	2.95206	0.36411	8.21167e+07	0	0.414145	0.434382
LG12	29635000	0.251302	0.0735149	3.41839	0.177787	7.18714e+07	0	0.0909298	0.161573
LG12	29645000	0.262746	0.0603717	4.35214	0.202375	77365349	0	0.181798	0.181781
LG12	29735000	0.384316	0.169261	2.27056	0.215055	7.46058e+07	0	0.181874	0.212091
LG12	29855000	0.319023	0.131409	2.42771	0.187614	6.87009e+07	0	0.121253	0.161599
LG12	29925000	0.307597	0.140319	2.19212	0.167277	71212199	0	0.161575	0.16168
LG12	29935000	0.343202	0.0650046	5.27966	0.278197	74351597	0	0.161567	0.181774
LG12	30655000	0.558517	0.242498	2.30318	0.316019	7.87679e+07	0	0.333383	0.343472
LG13	1925000	0.781797	0.488618	1.60002	0.293179	6.3819e+07	1.24495e-257	0.277846	0.361117
LG13	1945000	0.51199	0.323623	1.58206	0.188367	6.57418e+07	0	0.166719	0.194484
LG13	3875000	0.840949	0.410148	2.05036	0.430801	7.68453e+07	0	0.472275	0.500036
LG13	3925000	0.90401	0.613572	1.47336	0.290438	70320165	0	0.305503	0.333307
LG13	3935000	1.06105	0.592352	1.79125	0.4687	89469632	0	0.472211	0.47224
LG13	3955000	0.694989	0.410992	1.691	0.283997	67775325	0	0.250058	0.277834
LG13	3975000	0.967453	0.30497	3.1723	0.662484	91983349	0	0.666634	0.694438
LG13	5335000	0.653026	0.398593	1.63833	0.254433	70139922	0	0.277769	0.305621
LG13	9885000	0.997767	0.638392	1.56294	0.359375	7.77456e+07	0	0.361121	0.388949
LG13	14205000	0.793979	0.329478	2.40981	0.464501	8.57349e+07	0	0.50004	0.527813
LG13	22875000	0.920308	0.634181	1.45118	0.286127	6.92368e+07	0	0.277828	0.305557
LG14	6095000	0.594874	0.255297	2.33013	0.339577	7.9965e+07	0	0.333346	0.361128
LG14	6175000	0.500458	0.136642	3.66255	0.363816	83739224	0	0.416622	0.416686
LG14	6965000	1.03592	0.688742	1.50408	0.347179	74579763	0	0.361142	0.388886
LG14	12555000	0.51839	0.220667	2.3492	0.297723	7.42424e+07	0	0.277816	0.305527
LG15	15000	1.01165	0.624115	1.62093	0.387533	76248290	0	0.388852	0.416648
LG15	3135000	0.779814	0.48574	1.60541	0.294073	7.15998e+07	0	0.305552	0.305558
LG15	26175000	0.435873	0.260041	1.67617	0.175832	60465997	3.8647e-147	0.0833739	0.0833966
LG15	26215000	0.576867	0.159073	3.62643	0.417794	85735316	0	0.416671	0.444462
LG16	3055000	0.356339	0.0952683	3.74038	0.261071	79334951	0	0.24993	0.250052
LG16	7765000	0.801362	0.341999	2.34317	0.459362	81717654	0	0.500024	0.527703
LG16	7775000	0.766015	0.350632	2.18467	0.415383	7.64192e+07	0	0.472207	0.499956
LG16	8055000	0.898169	0.0971681	9.24345	0.801	97814138	0	0.833309	0.833339
LG16	16895000	0.717337	0.412859	1.73749	0.304478	71878860	0	0.305603	0.333365
LG16	18435000	0.698713	0.320012	2.18339	0.378701	7.86489e+07	0	0.444427	0.472181
LG16	21385000	0.369538	0.181237	2.03897	0.188301	7.2817e+07	0	0.166628	0.166691
LG17	28835000	0.291725	0.147252	1.98113	0.144473	6.66021e+07	0	0.0909702	0.14137
LG17	28845000	0.563062	0.308669	1.82416	0.254393	71851172	0	0.252539	0.272712
LG17	30745000	0.836844	0.43789	1.91108	0.398954	75165776	0	0.424166	0.444496
LG18	21705000	0.861659	0.422736	2.03829	0.438924	75808202	0	0.414188	0.434364
LG18	22155000	0.494823	0.144786	3.41763	0.350038	8.42552e+07	0	0.363616	0.363651
LG18	22165000	0.654616	0.30477	2.14791	0.349847	73390897	0	0.434419	0.454542
LG18	27855000	0.74608	0.302636	2.46527	0.443444	81583161	0	0.454548	0.454546
LG18	27925000	0.263619	0.127498	2.06763	0.136121	6.57672e+07	0	0.090899	0.0909122
LG18	27935000	0.28708	0.0713706	4.02239	0.21571	76362750	0	0.181771	0.18181
LG18	27945000	0.315432	0.118555	2.66064	0.196877	72147891	0	0.161565	0.161646
LG18	28005000	0.484642	0.23461	2.06574	0.250033	68494714	0	0.181885	0.232258
LG18	28155000	0.675532	0.306425	2.20456	0.369108	7.9594e+07	0	0.434366	0.454459
LG19	225000	0.538128	0.273106	1.9704	0.265022	72735109	0	0.272705	0.272744
LG19	235000	0.493005	0.197014	2.50239	0.295992	7.53116e+07	0	0.272696	0.272788
LG19	245000	0.503595	0.269562	1.8682	0.234033	69999097	0	0.191846	0.232309
LG19	275000	0.623129	0.300159	2.076	0.32297	80423483	0	0.303044	0.323246
LG19	295000	0.595786	0.317268	1.87786	0.278518	7.23443e+07	0	0.303046	0.323271
LG19	9365000	0.574979	0.297592	1.9321	0.277386	7.18805e+07	0	0.272689	0.272739
LG19	13505000	0.611902	0.356375	1.71702	0.255527	7.18621e+07	0	0.272769	0.28284
LG19	14345000	0.413795	0.227033	1.82262	0.186762	6.10075e+07	7.81981e-169	0.0908932	0.0908941
LG19	16425000	0.514394	0.268695	1.91441	0.245699	68721294	0	0.272688	0.272713
LG19	16515000	0.555381	0.32009	1.73508	0.235291	70183603	0	0.252556	0.272671
LG19	16755000	0.988947	0.535946	1.84523	0.453	77121692	0	0.464699	0.494976
LG19	16765000	0.8231	0.47673	1.72655	0.346369	72901059	0	0.363557	0.373747
LG19	17285000	0.665779	0.322612	2.06371	0.343167	7.52211e+07	0	0.363599	0.37376
LG19	17365000	0.508031	0.297215	1.70931	0.210816	6.02232e+07	4.1508e-146	0.0807925	0.0908727
LG19	23405000	0.816318	0.444978	1.83452	0.371341	7.45647e+07	0	0.393879	0.424276
LG20	1845000	0.486293	0.159684	3.04535	0.326609	75476534	0	0.333272	0.333336
LG20	3415000	0.33475	0.0834583	4.01098	0.251292	78841029	0	0.249958	0.250014
LG20	4415000	0.788738	0.447155	1.7639	0.341583	7.17707e+07	0	0.361163	0.3889
LG20	11305000	0.850465	0.529603	1.60585	0.320862	#N/A	#N/A	#N/A	#N/A
LG20	11445000	1.06377	0.463087	2.29712	0.600682	#N/A	#N/A	#N/A	#N/A
LG20	13775000	0.27014	0.0561722	4.80914	0.213967	#N/A	#N/A	#N/A	#N/A
LG20	13785000	0.287105	0.145574	1.97222	0.14153	#N/A	#N/A	#N/A	#N/A
LG20	20065000	0.640836	0.283549	2.26005	0.357286	#N/A	#N/A	#N/A	#N/A
LG20	23145000	0.844299	0.281572	2.99852	0.562727	#N/A	#N/A	#N/A	#N/A
LG22	2185000	0.49226	0.151529	3.24861	0.340731	78059887	0	0.303049	0.343394
LG22	2965000	0.329785	0.0704707	4.67975	0.259314	76583835	0	0.181738	0.181823
LG23	1195000	0.978848	0.36673	2.66912	0.612118	81098938	0	0.666703	0.697018
LG23	1215000	0.808628	0.428846	1.88559	0.379782	77408879	0	0.434397	0.454496
LG23	1245000	0.924535	0.351454	2.6306	0.573081	81296995	0	0.61612	0.636342
LG23	9355000	0.528329	0.291626	1.81166	0.236703	69452859	0	0.191917	0.232312
LG23	9405000	0.660879	0.269595	2.45138	0.391284	82713881	0	0.393916	0.414138
LG23	9545000	0.507031	0.225	2.25347	0.282031	7.45992e+07	0	0.272772	0.292931
LG23	9555000	0.614475	0.313858	1.95781	0.300617	7.30609e+07	0	0.282832	0.313182
LG23	9585000	0.279018	0.117766	2.36925	0.161252	69966446	0	0.090961	0.141478
LG23	11155000	0.660125	0.338277	1.95143	0.321848	7.05093e+07	0	0.272731	0.303081
LG23	16885000	0.429503	0.222955	1.9264	0.206547	68870756	0	0.18176	0.181831
LG23	18295000	0.993055	0.451788	2.19806	0.541267	8.30872e+07	0	0.595989	0.616089
LG23	28755000	0.685704	0.367385	1.86644	0.318319	74677298	0	0.363615	0.363638

## Sheet: KalamboRiverKa2_F
Linkage_Group	pos	FmedianNormalWind	MmedianNormalWind	ratiomedianNormWind_FM	differenceNormWind_FM	Wilcox_statist	Wilcox_p_value	Wilcox_confint1	Wilcox_confint2
LG01	8605000	0.962795	0.592224	1.62573	0.370571	74219940	0	0.416735	0.416676
LG01	31685000	0.490734	0.305244	1.60768	0.18549	67347894	0	0.166669	0.166671
LG02	18355000	0.631944	0.329592	1.91735	0.302352	6.56973e+07	0	0.238122	0.285713
LG02	18485000	0.329031	0.160734	2.04706	0.168297	66809940	0	0.119058	0.142853
LG02	18555000	0.439056	0.185223	2.37042	0.253833	77305076	0	0.285722	0.285778
LG02	18645000	0.462904	0.251508	1.84051	0.211396	68226774	0	0.214249	0.214324
LG02	18655000	0.442149	0.222819	1.98434	0.219329	73480130	0	0.28567	0.285779
LG02	18665000	0.497329	0.209804	2.37044	0.287525	7.42716e+07	0	0.285776	0.321398
LG02	18675000	0.463854	0.163259	2.84122	0.300595	81043231	0	0.285751	0.297606
LG02	18705000	0.462782	0.0857331	5.39794	0.377049	85436705	0	0.35719	0.416659
LG02	19225000	0.505878	0.274448	1.84326	0.23143	72169974	0	0.238052	0.261864
LG02	19455000	0.598769	0.341083	1.75549	0.257686	7.15948e+07	0	0.261822	0.285709
LG02	19495000	0.535968	0.205163	2.6124	0.330805	77221319	0	0.321427	0.345243
LG02	19525000	0.347808	0.211329	1.64581	0.136479	6.56702e+07	0	0.13096	0.142833
LG02	19535000	0.280936	0.173799	1.61644	0.107137	63309026	1.28553e-243	0.0714548	0.0714474
LG02	19545000	0.697987	0.386928	1.80392	0.311059	74325241	0	0.309543	0.333374
LG02	19675000	0.645614	0.295137	2.18751	0.350477	7.80163e+07	0	0.357179	0.369032
LG02	20545000	0.463682	0.172483	2.68828	0.291199	8.3611e+07	0	0.357115	0.357171
LG02	25925000	0.756846	0.466787	1.6214	0.290059	78941030	0	0.309509	0.32149
LG03	20755000	0.925967	0.158922	5.82657	0.767046	88703361	0	0.799943	0.800019
LG03	25835000	0.269763	0.0232727	11.5914	0.24649	89651735	0	0.200011	0.299991
LG03	25845000	0.29972	0.0235101	12.7485	0.27621	91326355	0	0.299989	0.299998
LG03	25855000	0.29725	0.0425582	6.98455	0.254692	90781692	0	0.299937	0.299972
LG03	26015000	0.762994	0.0889786	8.57502	0.674015	9.03655e+07	0	0.699946	0.699986
LG03	26055000	0.837046	0.0527697	15.8622	0.784277	9.63332e+07	0	0.799961	0.799996
LG03	26075000	0.606679	0.0393086	15.4338	0.567371	90304126	0	0.599998	0.600063
LG03	26085000	0.60097	0.0421833	14.2466	0.558787	88768783	0	0.599939	0.599951
LG03	26095000	0.885501	0.164071	5.39706	0.72143	86138162	0	0.775041	0.799919
LG03	26105000	0.771963	0.0766798	10.0674	0.695283	9.20468e+07	0	0.700039	0.700039
LG03	26185000	0.744216	0.0818793	9.08918	0.662336	9.09447e+07	0	0.60001	0.60002
LG03	26205000	0.634977	0.122313	5.19142	0.512664	80524266	0	0.500024	0.574964
LG03	27075000	0.790741	0.145973	5.41704	0.644768	87981603	0	0.699975	0.700007
LG03	27665000	0.518288	0.0914284	5.66879	0.42686	8.37861e+07	0	0.400061	0.475046
LG04	24875000	0.800445	0.362747	2.20662	0.437698	78447737	0	0.499954	0.499979
LG05	2515000	0.480581	0.249758	1.92418	0.230822	72973734	0	0.226212	0.250002
LG05	2565000	0.604761	0.374471	1.61497	0.23029	67262865	0	0.21432	0.250013
LG05	2575000	0.636244	0.360722	1.7638	0.275521	70649333	0	0.273781	0.28576
LG05	2785000	0.273537	0.161426	1.69451	0.112111	76855728	0	0.14289	0.142899
LG05	2795000	0.387811	0.240659	1.61145	0.147152	74719260	0	0.214217	0.214264
LG07	1635000	1.17257	0.729844	1.6066	0.442722	78490361	0	0.416675	0.499988
LG07	1895000	0.841982	0.555219	1.51649	0.286763	7.10665e+07	0	0.33331	0.333384
LG07	1905000	0.900943	0.566693	1.58983	0.33425	77311707	0	0.333338	0.416613
LG07	1915000	1.1955	0.709337	1.68537	0.48616	83513682	0	0.499943	0.500073
LG07	1925000	1.123	0.652726	1.72047	0.47027	8.51761e+07	0	0.499952	0.499983
LG07	1945000	0.848448	0.543362	1.56148	0.305086	7.39304e+07	0	0.333311	0.333355
LG07	1955000	0.985685	0.640744	1.53834	0.344941	73087144	0	0.33334	0.416607
LG07	2465000	1.10223	0.701255	1.5718	0.400977	74705066	0	0.416638	0.416696
LG07	2505000	1.33178	0.791154	1.68333	0.540621	8.1823e+07	0	0.500061	0.583318
LG07	2525000	1.21417	0.779455	1.55772	0.434715	76601544	0	0.416669	0.499922
LG07	2545000	1.19215	0.654193	1.82232	0.537955	82025478	0	0.583309	0.583345
LG07	2585000	1.22839	0.771773	1.59164	0.456613	8.07017e+07	0	0.416703	0.499987
LG07	2595000	0.900527	0.475886	1.89232	0.424641	7.72023e+07	0	0.416724	0.416685
LG07	2695000	0.562927	0.361064	1.55908	0.201863	6.05273e+07	8.50076e-148	0.166654	0.166637
LG07	3355000	1.0442	0.692664	1.50751	0.351532	71930755	0	0.416647	0.416737
LG07	6335000	0.93509	0.528405	1.76964	0.406684	7.78146e+07	0	0.416611	0.416682
LG07	7375000	1.27226	0.827351	1.53776	0.444914	7.97868e+07	0	0.416706	0.499989
LG07	9215000	0.649752	0.336141	1.93297	0.31361	7.66716e+07	0	0.333257	0.333268
LG07	13205000	0.855364	0.555844	1.53886	0.29952	6.8259e+07	0	0.333275	0.333343
LG07	14375000	0.338616	0.212137	1.59621	0.126479	64202135	8.92264e-272	0.0833671	0.0833362
LG07	15095000	0.947539	0.605356	1.56526	0.342182	6.89455e+07	0	0.333376	0.416594
LG07	20305000	0.947464	0.629187	1.50585	0.318277	7.09024e+07	0	0.333332	0.333356
LG07	26105000	0.444897	0.26719	1.6651	0.177707	6.79658e+07	0	0.166687	0.166692
LG07	29945000	0.674708	0.359897	1.87472	0.31481	7.71255e+07	0	0.499922	0.499935
LG07	29955000	0.746817	0.392661	1.90194	0.354156	74289133	0	0.416671	0.499977
LG07	29965000	0.817093	0.508416	1.60714	0.308677	69725294	0	0.333383	0.416654
LG07	31265000	0.503958	0.325617	1.5477	0.17834	58163721	7.07324e-92	0.0833018	0.0833453
LG07	31885000	1.08246	0.704205	1.53714	0.378254	73941600	0	0.416666	0.416674
LG07	31915000	0.840624	0.420625	1.99851	0.42	7.88887e+07	0	0.416688	0.499992
LG07	31925000	0.809861	0.492084	1.64578	0.317777	6.96608e+07	0	0.333358	0.416646
LG08	985000	0.429086	0.177266	2.42058	0.25182	71999857	0	0.250056	0.273805
LG08	995000	0.504157	0.255566	1.97271	0.248591	7.45452e+07	0	0.250023	0.261959
LG08	1005000	0.350029	0.141894	2.46683	0.208135	72349780	0	0.20243	0.214244
LG08	4315000	0.900203	0.344507	2.61302	0.555696	8.99112e+07	0	0.595213	0.607116
LG08	14105000	0.74664	0.0654101	11.4147	0.681229	91528040	0	0.785685	0.78566
LG08	14125000	0.468782	0.264349	1.77335	0.204433	6.85166e+07	0	0.166702	0.214285
LG09	1755000	0.291138	0.0854165	3.40845	0.205721	7.39967e+07	0	0.166603	0.166649
LG09	2785000	0.890011	0.43274	2.05669	0.457271	86664337	0	0.416752	0.499946
LG09	2795000	1.11442	0.544529	2.04658	0.569893	9.37138e+07	0	0.583287	0.583394
LG09	2805000	0.751092	0.311002	2.41507	0.440089	89902526	0	0.416685	0.416736
LG09	2875000	0.48191	0.241326	1.99693	0.240584	7.32183e+07	0	0.249976	0.250007
LG10	17625000	0.342141	0.21527	1.58936	0.126871	5.82588e+07	1.33111e-93	0.0833293	0.0833101
LG10	23475000	1.06836	0.675349	1.58194	0.393011	7.28543e+07	0	0.416638	0.416709
LG10	23485000	0.890353	0.560969	1.58717	0.329384	6.81093e+07	0	0.333344	0.416615
LG10	24615000	0.9981	0.643402	1.55128	0.354698	6.95965e+07	0	0.333346	0.416623
LG10	24625000	0.899593	0.435023	2.06792	0.46457	81934266	0	0.5	0.500034
LG10	25825000	0.396035	0.246534	1.60641	0.149502	64688310	4.00165e-287	0.166647	0.166625
LG10	25945000	0.788963	0.470436	1.67709	0.318526	7.18817e+07	0	0.333293	0.333304
LG10	26475000	0.253725	0.152385	1.66503	0.10134	6.36534e+07	1.07309e-256	0.0832891	0.0833662
LG11	95000	0.690281	0.380329	1.81496	0.309952	7.53426e+07	0	0.416632	0.416656
LG11	12935000	0.80042	0.412309	1.94131	0.388111	7.24142e+07	0	0.333374	0.333391
LG11	19545000	0.62962	0.270873	2.32441	0.358747	6.35261e+07	1.03673e-248	0.166634	0.166709
LG12	2595000	0.873627	0.372271	2.34675	0.501356	85590839	0	0.535755	0.547661
LG12	5925000	0.951791	0.262574	3.62485	0.689217	88638245	0	0.773789	0.785682
LG12	21455000	0.340666	0.151343	2.25095	0.189323	6.94383e+07	0	0.142808	0.142872
LG13	3835000	0.560977	0.397902	1.40984	0.163075	6.69583e+07	0	0.166728	0.166685
LG13	3885000	0.309919	0.174674	1.77427	0.135245	6.44204e+07	1.03515e-287	0.083343	0.0833576
LG13	7505000	1.08692	0.766123	1.41873	0.320801	73971229	0	0.333277	0.333342
LG13	7515000	1.05149	0.711754	1.47733	0.339741	7.6545e+07	0	0.333334	0.333335
LG13	7715000	0.953288	0.657826	1.44915	0.295462	66397668	0	0.250049	0.333288
LG13	13875000	1.06284	0.728435	1.45907	0.3344	66882471	0	0.333364	0.333365
LG13	14935000	0.550078	0.368138	1.49422	0.18194	6.41872e+07	1.7133e-266	0.166689	0.166677
LG14	14895000	0.898324	0.595657	1.50812	0.302667	7.24995e+07	0	0.321489	0.345193
LG14	18935000	0.816083	0.50365	1.62034	0.312433	70451802	0	0.345245	0.368998
LG14	21575000	0.507649	0.334233	1.51885	0.173416	67587535	0	0.202328	0.214252
LG14	27555000	0.590134	0.185531	3.18078	0.404602	8.70739e+07	0	0.42858	0.42862
LG14	28095000	0.587077	0.315768	1.8592	0.271309	72001340	0	0.285727	0.333279
LG15	6025000	1.15618	0.691406	1.67221	0.46477	72660217	0	0.499942	0.50003
LG15	18855000	0.442906	0.216078	2.04975	0.226827	74204038	0	0.249985	0.249961
LG15	18885000	0.315718	0.16725	1.8877	0.148468	6.85745e+07	0	0.166628	0.166664
LG15	19095000	0.620355	0.340941	1.81954	0.279414	71842514	0	0.333311	0.333332
LG15	19125000	0.689948	0.414575	1.66423	0.275372	7.23833e+07	0	0.250012	0.333332
LG15	22935000	0.65156	0.383937	1.69705	0.267623	6.77643e+07	0	0.250047	0.250078
LG15	22945000	0.947714	0.526822	1.79892	0.420891	74469835	0	0.416676	0.499943
LG15	22985000	1.27349	0.652143	1.95278	0.621346	8.49746e+07	0	0.666648	0.666682
LG16	865000	0.518706	0.247859	2.09275	0.270848	73510144	0	0.250053	0.333302
LG16	3185000	0.612355	0.325567	1.88089	0.286788	7.13875e+07	0	0.250004	0.250023
LG16	3195000	0.755358	0.444289	1.70015	0.311069	72646260	0	0.333318	0.333347
LG16	21065000	0.255566	0.0924241	2.76515	0.163142	71516011	0	0.166605	0.166625
LG16	23875000	0.936948	0.436448	2.14676	0.5005	8.32339e+07	0	0.583265	0.583303
LG16	23895000	0.843474	0.303578	2.77844	0.539896	8.63392e+07	0	0.583331	0.583283
LG16	23905000	0.569901	0.158151	3.60353	0.41175	7.96823e+07	0	0.416632	0.41666
LG16	23915000	0.956038	0.521764	1.83232	0.434273	8.17208e+07	0	0.416671	0.499984
LG16	23925000	0.860339	0.491226	1.75141	0.369113	77483032	0	0.416631	0.416617
LG16	23935000	0.925274	0.496167	1.86484	0.429107	7.3214e+07	0	0.416693	0.499957
LG18	3865000	0.867322	0.429332	2.02016	0.43799	83764311	0	0.416689	0.499968
LG18	20305000	0.738451	0.299137	2.46861	0.439314	8.3297e+07	0	0.49998	0.499941
LG18	20315000	0.807453	0.329825	2.44812	0.477627	8.28394e+07	0	0.50004	0.583289
LG18	20355000	0.915067	0.201696	4.53685	0.71337	9.33114e+07	0	0.749956	0.749938
LG19	11485000	1.11201	0.64666	1.71963	0.465353	78779122	0	0.499967	0.5
LG19	17625000	0.670425	0.365355	1.83499	0.305069	70548222	0	0.333249	0.333354
LG19	17635000	0.565327	0.245267	2.30494	0.32006	73886823	0	0.250038	0.250023
LG19	17645000	0.453838	0.237176	1.9135	0.216662	6.88376e+07	0	0.16658	0.166705
LG20	3375000	0.429382	0.211646	2.02878	0.217737	6.97735e+07	0	0.166749	0.166681
LG20	3385000	0.864189	0.366822	2.35588	0.497367	84323500	0	0.500087	0.500014
LG20	3395000	0.711662	0.37073	1.91963	0.340933	7.35822e+07	0	0.333336	0.416663
LG20	3405000	0.691106	0.293112	2.35782	0.397994	7.99287e+07	0	0.499968	0.499965
LG20	3445000	1.32212	0.757833	1.7446	0.564285	8.38566e+07	0	0.583342	0.583368
LG20	3505000	1.23029	0.775756	1.58593	0.454538	81270610	0	0.416692	0.416707
LG20	3595000	0.903443	0.598773	1.50882	0.30467	7.04703e+07	0	0.250043	0.333266
LG20	13545000	0.464754	0.0250225	18.5734	0.439731	97704438	0	0.416603	0.416704
LG20	13555000	0.42999	0.00789921	54.4346	0.422091	9.66693e+07	0	0.416666	0.416658
LG20	16885000	1.00927	0.655368	1.54	0.353898	75427774	0	0.333386	0.416643
LG20	18065000	0.858947	0.532055	1.6144	0.326892	71446838	0	0.333364	0.33337
LG20	18075000	1.01637	0.58795	1.72867	0.428424	7.92615e+07	0	0.416714	0.499976
LG20	26175000	0.721769	0.436356	1.65408	0.285413	68045183	0	0.333332	0.333311
LG22	75000	0.650927	0.0813835	7.99826	0.569543	94160979	0	0.583263	0.583283
LG22	1465000	0.487576	0.101981	4.78103	0.385595	8.61594e+07	0	0.416605	0.416608
LG22	1475000	0.636261	0.234802	2.70978	0.40146	8.31332e+07	0	0.416689	0.416674
LG22	2905000	0.455646	0.173874	2.62055	0.281772	7.2355e+07	0	0.166694	0.166708
LG22	2935000	0.28258	0.0485785	5.81698	0.234002	87934452	0	0.249959	0.249956
LG22	2975000	0.553211	0.228877	2.41707	0.324334	74839656	0	0.250045	0.333286
LG22	2985000	0.566235	0.203746	2.77912	0.362489	7.84765e+07	0	0.333323	0.333398
LG22	3005000	0.643752	0.26784	2.4035	0.375912	77042659	0	0.333357	0.416661
LG22	3125000	0.770673	0.202346	3.80868	0.568327	85578674	0	0.583364	0.583368
LG22	3135000	0.636545	0.0939239	6.77724	0.542621	92545129	0	0.500002	0.583315
LG22	3145000	0.38057	0.0327717	11.6128	0.347799	9.21105e+07	0	0.333324	0.333323
LG22	3205000	0.549337	0.00448289	122.541	0.544854	9.3364e+07	0	0.41658	0.4166
LG22	3215000	0.729994	0.00750758	97.2342	0.722486	97547038	0	0.666721	0.749959
LG22	3225000	0.747325	0.113539	6.58212	0.633787	9.36105e+07	0	0.666714	0.666698
LG22	3245000	0.252233	0.0643019	3.92264	0.187931	81056675	0	0.166696	0.166679
LG22	3295000	0.382187	0.136095	2.80824	0.246092	7.14552e+07	0	0.166701	0.16667
LG22	4505000	0.453813	0.0738509	6.14498	0.379962	89503063	0	0.333373	0.333335
LG22	5805000	0.328692	0.13312	2.46914	0.195572	6.47149e+07	0	0.0833248	0.0833984
LG23	4435000	0.689473	0.331642	2.07897	0.357831	79100840	0	0.41662	0.416662
LG23	4445000	0.701222	0.343124	2.04364	0.358098	78220863	0	0.333341	0.416662
LG23	8295000	0.984752	0.510574	1.92871	0.474178	7.95098e+07	0	0.499976	0.500017
LG23	9485000	0.421966	0.214679	1.96557	0.207288	7.01723e+07	0	0.166669	0.166713

## Sheet: LufubuLakeLfL_F
Linkage_Group	pos	FmedianNormalWind	MmedianNormalWind	ratiomedianNormWind_FM	differenceNormWind_FM	Wilcox_statist	Wilcox_p_value	Wilcox_confint1	Wilcox_confint2
LG01	275000	0.787877	0.471858	1.66973	0.316018	7.27054e+07	0	0.333391	0.388884
LG01	21485000	1.07253	0.580164	1.84866	0.492362	7.87588e+07	0	0.499931	0.50005
LG01	31235000	0.740593	0.408931	1.81104	0.331661	75700820	0	0.388842	0.38889
LG02	5795000	0.928091	0.463437	2.00263	0.464654	76188340	0	0.44445	0.499997
LG02	11065000	0.529797	0.20639	2.56696	0.323407	7.59861e+07	0	0.277789	0.333285
LG02	11075000	0.7758	0.44675	1.73654	0.32905	7.34037e+07	0	0.333368	0.388828
LG02	15745000	0.912592	0.554856	1.64474	0.357736	7.45448e+07	0	0.388886	0.388915
LG02	16415000	1.0624	0.530047	2.00435	0.532352	8.06416e+07	0	0.555588	0.611095
LG02	18365000	0.477236	0.202102	2.36136	0.275134	74988479	0	0.222238	0.277729
LG02	18665000	0.346388	0.155557	2.22676	0.190831	6.00584e+07	9.35007e-141	0.0555509	0.0555086
LG02	18765000	0.639342	0.366075	1.74648	0.273267	6.69886e+07	0	0.222273	0.222263
LG02	20635000	0.353015	0.130165	2.71206	0.22285	7.30541e+07	0	0.166627	0.166729
LG02	21085000	0.705041	0.351437	2.00616	0.353604	73253472	0	0.388875	0.388842
LG03	295000	0.292871	0.0145785	20.0892	0.278292	8.69021e+07	0	0.250042	0.250037
LG03	3935000	1.08615	0.2048	5.30348	0.88135	93102445	0	0.916663	0.916668
LG03	15655000	0.404943	0.0120488	33.6086	0.392894	92477426	0	0.416581	0.416651
LG03	24815000	1.45544	0.230287	6.3201	1.22515	92074486	0	1.41666	1.41661
LG03	25055000	0.528522	0.00678932	77.8461	0.521733	96257837	0	0.500043	0.500025
LG03	25285000	0.894302	0.160374	5.57636	0.733928	88689440	0	0.783293	0.833306
LG03	25295000	0.984193	0.136626	7.20354	0.847567	8.63638e+07	0	0.833347	0.91662
LG04	7355000	0.395944	0.132074	2.99789	0.263869	8.22022e+07	0	0.277713	0.277786
LG04	12565000	0.784016	0.342803	2.28707	0.441213	7.92487e+07	0	0.451405	0.472265
LG04	13455000	0.253491	0.113695	2.22958	0.139796	6.60877e+07	0	0.104151	0.111091
LG05	355000	0.402438	0.140808	2.85806	0.261629	78783201	0	0.277836	0.277786
LG05	2645000	0.370402	0.230399	1.60765	0.140003	6.57438e+07	0	0.11114	0.166639
LG05	2775000	0.400704	0.0284805	14.0694	0.372224	8.50136e+07	0	0.33338	0.38888
LG05	6515000	1.21614	0.71234	1.70725	0.5038	81140025	0	0.500017	0.555464
LG05	16845000	0.662706	0.295015	2.24635	0.367691	7.55989e+07	0	0.388927	0.444403
LG05	16885000	0.864041	0.488135	1.77009	0.375907	79746032	0	0.388829	0.388939
LG05	16935000	0.913931	0.544884	1.67729	0.369046	7.36283e+07	0	0.388936	0.444383
LG05	23915000	0.673649	0.338916	1.98766	0.334733	7.15199e+07	0	0.333296	0.333354
LG07	1585000	0.876251	0.577137	1.51827	0.299115	6.92103e+07	0	0.333393	0.388856
LG07	2545000	0.40677	0.212012	1.91862	0.194758	7.21825e+07	0	0.166732	0.222195
LG07	4105000	0.797876	0.447483	1.78303	0.350393	7.75176e+07	0	0.388887	0.388895
LG07	6195000	1.18055	0.777744	1.51791	0.402804	76369097	0	0.388951	0.444422
LG07	7555000	0.540274	0.330484	1.6348	0.20979	67816074	0	0.166709	0.222197
LG07	16645000	0.608861	0.374063	1.6277	0.234799	68965238	0	0.222267	0.277771
LG07	19405000	0.961032	0.576703	1.66642	0.384328	73213210	0	0.388892	0.444418
LG07	30265000	0.805169	0.495289	1.62565	0.30988	68591179	0	0.333267	0.333285
LG07	30855000	0.749247	0.470614	1.59206	0.278633	7.09065e+07	0	0.277831	0.277854
LG07	33685000	0.912881	0.58673	1.55588	0.326151	73937789	0	0.333281	0.333334
LG07	38855000	0.890394	0.588524	1.51293	0.30187	6.55789e+07	0	0.27775	0.277807
LG07	42465000	4.01048	2.23644	1.79324	1.77403	49973721	0.929157	-2.97969e-05	1.7958e-05
LG07	42475000	7.08651	3.73262	1.89854	3.3539	64993918	6.14592e-295	0.499953	0.555499
LG07	49075000	1.24801	0.827967	1.50732	0.420047	78271651	0	0.444483	0.499978
LG07	50345000	0.393494	0.161589	2.43515	0.231905	7.76111e+07	0	0.222185	0.222222
LG07	53275000	0.961487	0.612233	1.57046	0.349254	7.19423e+07	0	0.388849	0.388825
LG07	53555000	0.746803	0.490373	1.52293	0.25643	68476399	0	0.27777	0.277807
LG07	53605000	1.01873	0.633576	1.60791	0.385156	7.31095e+07	0	0.444382	0.444464
LG08	705000	0.945044	0.518509	1.82262	0.426535	7.8849e+07	0	0.444401	0.444538
LG08	5465000	0.731216	0.442167	1.65371	0.289049	7.12035e+07	0	0.277797	0.333302
LG08	5475000	0.76334	0.477869	1.59738	0.285471	7.216e+07	0	0.277826	0.33332
LG08	8005000	0.953571	0.487385	1.95651	0.466187	8.36561e+07	0	0.49994	0.500009
LG08	13315000	0.468348	0.305936	1.53087	0.162412	62157117	1.20969e-197	0.111168	0.16666
LG09	1935000	0.279711	0.0842728	3.31911	0.195438	63090479	8.97102e-281	7.27902e-05	4.48368e-05
LG09	7725000	1.1515	0.570949	2.01681	0.580547	8.47785e+07	0	0.625073	0.645858
LG09	9485000	0.61215	0.319624	1.91522	0.292526	7.40182e+07	0	0.284751	0.312495
LG10	6755000	0.775556	0.435288	1.78171	0.340268	75644464	0	0.388848	0.409712
LG10	27125000	0.803359	0.444649	1.80672	0.358709	7.2471e+07	0	0.388899	0.423626
LG10	27205000	0.519887	0.315493	1.64785	0.204393	6.81091e+07	0	0.215275	0.222224
LG10	27225000	0.650896	0.347971	1.87054	0.302925	73746699	0	0.312529	0.333252
LG10	27235000	0.346893	0.0635499	5.45859	0.283343	83530864	0	0.277825	0.277817
LG10	27245000	0.541468	0.184844	2.92932	0.356624	85342147	0	0.388872	0.388893
LG10	27255000	0.638486	0.368869	1.73093	0.269617	7.18858e+07	0	0.305504	0.326393
LG10	27265000	0.323295	0.121613	2.6584	0.201683	74499101	0	0.19447	0.215339
LG10	27275000	0.475569	0.295402	1.60991	0.180167	6.71306e+07	0	0.201391	0.215322
LG11	19385000	0.364158	0.149098	2.44241	0.21506	76720770	0	0.222179	0.222283
LG11	19415000	0.507377	0.103815	4.88734	0.403562	86442413	0	0.409686	0.430536
LG11	22665000	0.595824	0.248856	2.39425	0.346967	78081389	0	0.36804	0.381948
LG11	27195000	1.04909	0.564169	1.85953	0.484921	77867319	0	0.520812	0.548658
LG11	28765000	0.796231	0.347228	2.29311	0.449004	79355157	0	0.520861	0.541724
LG12	29345000	0.480985	0.215812	2.22873	0.265173	73667097	0	0.222233	0.222274
LG12	29835000	0.319351	0.0933129	3.42237	0.226039	8.39267e+07	0	0.222198	0.22217
LG12	29845000	0.585897	0.187303	3.12806	0.398593	8.54779e+07	0	0.388929	0.444393
LG12	29925000	0.257363	0.0822807	3.12787	0.175082	66543450	0	0.0555984	0.11111
LG12	29965000	0.326312	0.0617383	5.28541	0.264574	8.19175e+07	0	0.2777	0.277796
LG13	795000	0.566954	0.324962	1.74468	0.241992	7.08282e+07	0	0.277741	0.277698
LG13	945000	0.660184	0.330128	1.99978	0.330056	7.49062e+07	0	0.333351	0.388868
LG13	1265000	0.980235	0.569243	1.722	0.410992	7.8866e+07	0	0.444457	0.499985
LG13	3605000	0.960854	0.685965	1.40073	0.274889	6.83135e+07	0	0.27782	0.333296
LG13	3635000	0.810941	0.579137	1.40026	0.231805	66069041	0	0.222227	0.277747
LG13	3675000	0.554106	0.269451	2.05643	0.284655	7.17962e+07	0	0.277787	0.333302
LG13	3685000	0.296787	0.147274	2.0152	0.149513	68865418	0	0.111074	0.111142
LG13	3695000	0.369219	0.202063	1.82724	0.167156	64606915	4.80314e-286	0.111116	0.166602
LG13	4375000	1.09161	0.745992	1.4633	0.345615	7.04228e+07	0	0.388912	0.444416
LG13	4765000	0.754713	0.390878	1.93082	0.363836	77570865	0	0.444437	0.444402
LG13	4945000	0.780439	0.532202	1.46643	0.248236	66814705	0	0.222242	0.277696
LG13	5105000	1.08394	0.739959	1.46487	0.343982	7.30335e+07	0	0.333288	0.333336
LG13	5275000	0.863864	0.600784	1.43789	0.263079	6.75377e+07	0	0.277723	0.277782
LG13	7755000	0.829073	0.561377	1.47685	0.267695	6.80559e+07	0	0.277795	0.333266
LG13	12185000	0.550128	0.378923	1.45182	0.171205	64210295	1.82423e-268	0.166699	0.166699
LG13	12435000	0.51782	0.345332	1.49949	0.172488	6.82423e+07	0	0.222195	0.222266
LG13	13895000	0.884862	0.505083	1.75191	0.379779	7.70222e+07	0	0.38893	0.444425
LG13	15815000	0.888061	0.629437	1.41088	0.258624	6.47966e+07	1.11636e-287	0.277745	0.277809
LG13	17225000	0.95876	0.640269	1.49743	0.31849	7.08348e+07	0	0.333323	0.333341
LG13	20485000	0.733521	0.47593	1.54124	0.257591	6.56197e+07	0	0.333284	0.388842
LG13	22405000	0.61996	0.441406	1.40451	0.178554	6.12476e+07	1.32649e-169	0.166587	0.166695
LG13	23425000	0.793115	0.474486	1.67153	0.318629	7.0647e+07	0	0.333305	0.333351
LG13	23575000	1.07411	0.745631	1.44054	0.328478	7.681e+07	0	0.333373	0.333374
LG13	25515000	0.850059	0.596813	1.42433	0.253247	6.85049e+07	0	0.222276	0.27773
LG14	24505000	0.823662	0.527492	1.56147	0.29617	6.82635e+07	0	0.277792	0.333286
LG14	27665000	1.11352	0.665628	1.67288	0.447889	8.05959e+07	0	0.499953	0.500001
LG14	27675000	0.98609	0.572354	1.72287	0.413736	76934729	0	0.388961	0.444376
LG15	2545000	0.721689	0.321951	2.24161	0.399738	80232131	0	0.444414	0.444471
LG15	2555000	0.605528	0.36633	1.65296	0.239198	6.8687e+07	0	0.22228	0.277711
LG15	10025000	0.378462	0.227294	1.66508	0.151168	7.28261e+07	0	0.166607	0.166637
LG15	16295000	0.812602	0.473908	1.71468	0.338694	7.59986e+07	0	0.333279	0.33337
LG15	16855000	0.651124	0.28761	2.26391	0.363514	7.69231e+07	0	0.388873	0.388882
LG15	26465000	0.549123	0.259185	2.11865	0.289938	7.18243e+07	0	0.333304	0.333342
LG15	26475000	0.283416	0.16595	1.70784	0.117466	64124515	3.95975e-267	0.111071	0.111071
LG15	28055000	0.782922	0.43339	1.80651	0.349532	76498873	0	0.388853	0.388886
LG16	385000	0.338856	0.153835	2.20273	0.185021	7.51848e+07	0	0.199989	0.200042
LG16	3085000	0.337291	0.131342	2.56803	0.205949	74790521	0	0.199945	0.200014
LG16	3175000	0.717718	0.355453	2.01916	0.362265	70569026	0	0.400058	0.444443
LG16	16445000	0.681132	0.372052	1.83075	0.30908	7.77128e+07	0	0.316639	0.32771
LG17	23575000	0.681121	0.36388	1.87183	0.31724	7.05205e+07	0	0.277822	0.333304
LG17	31645000	0.678843	0.37028	1.83333	0.308564	7.62722e+07	0	0.33327	0.333287
LG18	23425000	0.733354	0.262099	2.79801	0.471256	83179979	0	0.534767	0.555534
LG18	25005000	0.273856	0.0383337	7.14401	0.235522	81655449	0	0.166638	0.166685
LG19	345000	0.450794	0.265168	1.70003	0.185626	66453294	0	0.166754	0.222193
LG19	6145000	0.6704	0.343132	1.95376	0.327267	7.32561e+07	0	0.333373	0.388878
LG19	17835000	0.428368	0.228366	1.8758	0.200002	57874975	9.67127e-86	0.0555242	0.0555605
LG20	875000	0.413759	0.253752	1.63056	0.160006	6.6504e+07	0	0.166597	0.166702
LG20	885000	0.595357	0.3938	1.51183	0.201558	6.72982e+07	0	0.222163	0.222272
LG20	1405000	0.733221	0.482768	1.51878	0.250453	6.5951e+07	0	0.222172	0.222239
LG20	2785000	1.13697	0.627976	1.81053	0.508994	8.40603e+07	0	0.555511	0.555523
LG20	2795000	0.809314	0.524175	1.54397	0.285138	69133696	0	0.333326	0.333351
LG20	3445000	0.393166	0.236437	1.66288	0.156729	6.75662e+07	0	0.166645	0.166629
LG20	3695000	0.405971	0.246503	1.64692	0.159467	66782178	0	0.166604	0.166612
LG20	3805000	0.744842	0.395427	1.88364	0.349415	7.70493e+07	0	0.388889	0.388926
LG20	4135000	0.874385	0.476897	1.83349	0.397488	7.82955e+07	0	0.444412	0.444464
LG20	7395000	0.867947	0.570515	1.52134	0.297431	6.99656e+07	0	0.277805	0.333316
LG20	8595000	1.1049	0.705579	1.56595	0.399321	7.2054e+07	0	0.444437	0.4445
LG20	13335000	0.345999	0.100351	3.44788	0.245648	82582673	0	0.222245	0.27777
LG20	17975000	0.684715	0.444478	1.54049	0.240237	68903506	0	0.222233	0.27772
LG20	19015000	0.929551	0.493078	1.8852	0.436473	7.84653e+07	0	0.444475	0.49994
LG20	19515000	0.913203	0.56476	1.61698	0.348443	7.48619e+07	0	0.333377	0.388852
LG20	20865000	1.07524	0.269951	3.98309	0.805286	99882293	0	0.77783	0.833282
LG20	20875000	1.22063	0.434823	2.8072	0.78581	93928273	0	0.833311	0.833352
LG20	23045000	0.929129	0.616449	1.50723	0.31268	7.07171e+07	0	0.333326	0.333385
LG20	27335000	1.03169	0.680976	1.51501	0.350709	77089240	0	0.33341	0.388828
LG22	2985000	0.91773	0.279585	3.28248	0.638146	85505116	0	0.722263	0.77775
LG23	9555000	0.319701	0.173372	1.84402	0.14633	68462050	0	0.111163	0.16661
LG23	17245000	0.563255	0.300048	1.87722	0.263207	71798897	0	0.27778	0.277829
LG23	20945000	0.561494	0.272412	2.0612	0.289082	74821068	0	0.277797	0.333276
LG23	25405000	0.700458	0.371291	1.88655	0.329167	72326412	0	0.388811	0.388982
LG23	25975000	0.69908	0.345393	2.02401	0.353687	75260521	0	0.388839	0.388894
LG23	31565000	0.950555	0.511843	1.85712	0.438712	75939546	0	0.444454	0.499961
LG23	32295000	0.982491	0.347743	2.82534	0.634748	86803069	0	0.666695	0.722134
LG23	33025000	0.650041	0.357975	1.81588	0.292065	6.78668e+07	0	0.27773	0.277846

## Sheet: LufubuRiverLf2_F
Linkage_Group	pos	FmedianNormalWind	MmedianNormalWind	ratiomedianNormWind_FM	differenceNormWind_FM	Wilcox_statist	Wilcox_p_value	Wilcox_confint1	Wilcox_confint2
LG01	9295000	0.878039	0.482881	1.81834	0.395159	81609558	0	0.412914	0.431742
LG01	9305000	0.840293	0.52286	1.60711	0.317433	73986948	0	0.34857	0.371202
LG01	9315000	1.08238	0.530643	2.03976	0.55174	95342736	0	0.55688	0.572042
LG01	9325000	1.12531	0.588208	1.91312	0.537107	94114801	0	0.530212	0.545426
LG01	9335000	1.1459	0.619992	1.84825	0.525907	92044490	0	0.534169	0.553007
LG01	9345000	0.78199	0.237314	3.29517	0.544676	89219594	0	0.549277	0.568252
LG01	11625000	0.671742	0.317193	2.11777	0.354549	7.8185e+07	0	0.397688	0.409136
LG01	11695000	0.626592	0.312535	2.00487	0.314056	76404157	0	0.337121	0.363619
LG01	11765000	0.65753	0.388786	1.69124	0.268744	70303794	0	0.280311	0.318181
LG01	11795000	0.554399	0.310556	1.78518	0.243843	7.06686e+07	0	0.242415	0.265094
LG01	11805000	0.517953	0.264244	1.96013	0.253708	75360432	0	0.250036	0.272714
LG01	13945000	0.584033	0.316235	1.84683	0.267797	73039245	0	0.250006	0.272767
LG01	18905000	0.87509	0.426362	2.05246	0.448728	80862766	0	0.473509	0.499979
LG01	18915000	0.712006	0.355427	2.00324	0.356579	78386589	0	0.393998	0.409177
LG01	20035000	0.754915	0.350265	2.15527	0.40465	7.91248e+07	0	0.454472	0.46585
LG01	20045000	0.826804	0.480394	1.7211	0.34641	73819806	0	0.352205	0.371181
LG01	20405000	0.638613	0.370938	1.72162	0.267676	72648429	0	0.318232	0.329618
LG01	32515000	0.764319	0.414521	1.84386	0.349798	7.74461e+07	0	0.371182	0.390183
LG01	32575000	0.657562	0.350332	1.87697	0.30723	71201219	0	0.333364	0.363597
LG01	32595000	0.714883	0.405989	1.76085	0.308894	7.73544e+07	0	0.337088	0.348488
LG01	32605000	0.673087	0.360556	1.86681	0.312532	77409419	0	0.333309	0.348519
LG01	32615000	0.777927	0.480227	1.61991	0.2977	71502550	0	0.303064	0.329524
LG01	32645000	0.666247	0.336787	1.97824	0.32946	7.63041e+07	0	0.386406	0.409098
LG01	32655000	0.506781	0.293117	1.72894	0.213665	7.05362e+07	0	0.208372	0.227318
LG01	32665000	0.70388	0.366509	1.9205	0.33737	74459199	0	0.363634	0.371164
LG01	32685000	0.598445	0.369755	1.61849	0.22869	7.50437e+07	0	0.253761	0.268867
LG01	32725000	0.657571	0.324138	2.02867	0.333432	80705500	0	0.337175	0.352299
LG01	32765000	0.649876	0.30534	2.12837	0.344536	85100642	0	0.352272	0.371171
LG01	32775000	0.773036	0.458371	1.68649	0.314666	73226986	0	0.302983	0.32577
LG01	32785000	0.526902	0.316139	1.66668	0.210763	7.59531e+07	0	0.21587	0.23483
LG01	32795000	0.642627	0.371959	1.72768	0.270668	76483615	0	0.284111	0.295487
LG02	2345000	0.845711	0.494463	1.71036	0.351248	8.18415e+07	0	0.356023	0.367444
LG02	4375000	0.876131	0.513694	1.70555	0.362436	75300272	0	0.386286	0.409075
LG02	4385000	1.01084	0.616243	1.64034	0.394602	7.87386e+07	0	0.386331	0.405323
LG02	4395000	0.957963	0.555149	1.7256	0.402815	7.74151e+07	0	0.409031	0.431815
LG02	4405000	0.943892	0.58822	1.60466	0.355672	72302180	0	0.390089	0.416735
LG02	9425000	0.616661	0.336658	1.83171	0.280003	71198324	0	0.257624	0.280331
LG02	9495000	0.572425	0.326376	1.75388	0.246049	74360172	0	0.257531	0.280314
LG02	10425000	0.803324	0.491501	1.63443	0.311823	7.11203e+07	0	0.375046	0.405244
LG02	10635000	0.251957	0.128516	1.9605	0.12344	7.22381e+07	0	0.109816	0.136297
LG02	10775000	0.382139	0.230185	1.66014	0.151954	70948797	0	0.147785	0.155304
LG02	12765000	0.750398	0.462233	1.62342	0.288165	7.44977e+07	0	0.322003	0.344758
LG02	14145000	1.11235	0.669975	1.66028	0.442373	8.20213e+07	0	0.465981	0.481089
LG02	17985000	0.86345	0.506883	1.70345	0.356567	7.57242e+07	0	0.363675	0.386317
LG02	18325000	0.554408	0.327576	1.69246	0.226833	66248938	0	0.219731	0.242477
LG02	18345000	0.379108	0.170533	2.22308	0.208575	68654273	0	0.132625	0.136407
LG02	18355000	0.4138	0.152643	2.7109	0.261156	76793141	0	0.253772	0.272773
LG02	18455000	0.698662	0.427757	1.63331	0.270905	6.93637e+07	0	0.272755	0.291667
LG02	18485000	0.690208	0.424737	1.62503	0.265472	6.81781e+07	0	0.284112	0.314325
LG02	19305000	1.00641	0.569806	1.76623	0.436603	78810539	0	0.45453	0.473546
LG03	13335000	0.800632	0.0444081	18.029	0.756224	9.63229e+07	0	0.812491	0.812445
LG03	13345000	0.693262	0.0202792	34.1858	0.672983	9.84286e+07	0	0.625017	0.625035
LG03	13355000	0.757899	0.0192918	39.286	0.738607	9.7144e+07	0	0.750058	0.750025
LG03	13365000	0.788527	0.0967841	8.14728	0.691743	93466916	0	0.74996	0.749982
LG03	22375000	0.391523	0.0734302	5.33191	0.318093	87107135	0	0.312477	0.312506
LG03	22425000	0.45473	0.0395335	11.5024	0.415196	85441062	0	0.437451	0.437524
LG03	22435000	0.55097	0.0777422	7.08714	0.473228	9.09113e+07	0	0.437516	0.499931
LG04	15065000	0.318205	0.0627437	5.0715	0.255461	81709948	0	0.227329	0.272674
LG04	15095000	0.42573	0.114339	3.72342	0.311392	8.39199e+07	0	0.31817	0.318188
LG04	25415000	0.339193	0.142627	2.37819	0.196567	76794291	0	0.181877	0.227245
LG04	25455000	0.370786	0.144654	2.56326	0.226132	7.89642e+07	0	0.227367	0.227344
LG04	25675000	0.274154	0.0258383	10.6104	0.248316	8.96403e+07	0	0.272688	0.272666
LG04	25685000	0.389225	0.0104308	37.315	0.378794	95153325	0	0.363655	0.363674
LG04	25695000	0.387957	0.103481	3.74908	0.284476	7.87596e+07	0	0.318152	0.318151
LG05	85000	0.568189	0.348307	1.63129	0.219882	7.09682e+07	0	0.242393	0.250039
LG05	95000	0.52492	0.284234	1.84679	0.240686	68282266	0	0.189367	0.215941
LG05	12365000	0.64135	0.352256	1.82069	0.289093	#N/A	#N/A	#N/A	#N/A
LG05	13925000	1.14985	0.63507	1.81059	0.514783	#N/A	#N/A	#N/A	#N/A
LG05	13935000	0.997946	0.544816	1.83171	0.453129	#N/A	#N/A	#N/A	#N/A
LG05	13945000	1.21296	0.59814	2.02789	0.61482	#N/A	#N/A	#N/A	#N/A
LG05	13955000	1.03969	0.485206	2.14279	0.554486	#N/A	#N/A	#N/A	#N/A
LG05	13965000	1.27445	0.715433	1.78137	0.559017	#N/A	#N/A	#N/A	#N/A
LG05	14025000	1.17932	0.667046	1.76798	0.512277	#N/A	#N/A	#N/A	#N/A
LG05	14035000	0.947569	0.456121	2.07745	0.491448	#N/A	#N/A	#N/A	#N/A
LG05	14045000	1.00307	0.507783	1.9754	0.49529	#N/A	#N/A	#N/A	#N/A
LG05	14055000	1.038	0.567556	1.82889	0.47044	#N/A	#N/A	#N/A	#N/A
LG05	14065000	1.01696	0.618901	1.64317	0.398061	#N/A	#N/A	#N/A	#N/A
LG05	14085000	1.05267	0.657134	1.60191	0.395533	#N/A	#N/A	#N/A	#N/A
LG05	22945000	0.606676	0.305332	1.98694	0.301344	#N/A	#N/A	#N/A	#N/A
LG05	22955000	0.701107	0.39831	1.7602	0.302797	#N/A	#N/A	#N/A	#N/A
LG05	23045000	0.661488	0.387774	1.70586	0.273715	#N/A	#N/A	#N/A	#N/A
LG06	5415000	1.50411	0.778231	1.93273	0.725883	5.66995e+07	2.34367e-60	0.102282	0.136314
LG06	6015000	0.477052	0.260724	1.82972	0.216328	70065715	0	0.193139	0.219703
LG06	7015000	0.546609	0.265123	2.06171	0.281485	76512355	0	0.280298	0.291605
LG06	7025000	0.501777	0.214799	2.33603	0.286978	80876692	0	0.318151	0.318171
LG06	7075000	0.800325	0.421216	1.90003	0.379108	77880320	0	0.40154	0.424232
LG06	22435000	1.08243	0.441423	2.45214	0.641006	89825145	0	0.69315	0.708335
LG06	22455000	0.994223	0.301587	3.29664	0.692637	91246534	0	0.776595	0.791681
LG06	22485000	0.87788	0.463699	1.89321	0.414181	74617938	0	0.450758	0.477314
LG06	29885000	0.649085	0.344799	1.8825	0.304286	7.6102e+07	0	0.333317	0.352245
LG06	30115000	0.749789	0.414413	1.80928	0.335376	7.17897e+07	0	0.303042	0.325822
LG07	21395000	0.834742	0.287763	2.9008	0.546979	9.1629e+07	0	0.583332	0.583357
LG07	30855000	0.570014	0.350227	1.62755	0.219786	6.53223e+07	0	0.0833994	0.124983
LG07	37595000	0.313785	0.139086	2.25605	0.174699	7.78811e+07	0	0.166693	0.166675
LG07	43095000	1.0303	0.624763	1.6491	0.405534	8.20777e+07	0	0.4167	0.458333
LG07	43155000	1.053	0.551582	1.90906	0.501421	8.24778e+07	0	0.458405	0.499958
LG07	47485000	0.998109	0.662246	1.50716	0.335862	8.49721e+07	0	0.37497	0.374997
LG08	4745000	1.19052	0.696064	1.71036	0.494455	9.70113e+07	0	0.499956	0.499975
LG08	4795000	1.10811	0.70203	1.57843	0.406076	88738589	0	0.416711	0.4167
LG08	4875000	0.979798	0.647344	1.51357	0.332454	7.42992e+07	0	0.333336	0.374954
LG08	4925000	1.14313	0.715008	1.59877	0.428124	87044401	0	0.45833	0.458378
LG08	5005000	1.10743	0.737955	1.50067	0.369471	81868600	0	0.374995	0.375042
LG08	15325000	0.752983	0.41068	1.8335	0.342303	76323174	0	0.375076	0.416633
LG08	15335000	0.673641	0.371963	1.81104	0.301678	77326098	0	0.333293	0.333383
LG08	18045000	0.669896	0.36473	1.83669	0.305165	77340214	0	0.333379	0.333373
LG08	18055000	0.756358	0.432123	1.75033	0.324234	74549170	0	0.374967	0.375005
LG09	945000	0.746512	0.387066	1.92864	0.359446	79629001	0	0.363711	0.409062
LG09	1105000	0.33843	0.0636936	5.3134	0.274736	83669020	0	0.272737	0.272782
LG09	1135000	0.47463	0.172133	2.75735	0.302497	79615819	0	0.318219	0.363607
LG09	1875000	0.576401	0.223719	2.57646	0.352683	7.93443e+07	0	0.363616	0.363671
LG09	1895000	0.299788	0.114484	2.6186	0.185304	71329457	0	0.136399	0.181811
LG09	1955000	0.276595	0.138318	1.9997	0.138277	6.69112e+07	0	0.0908939	0.0909525
LG09	2005000	0.854183	0.297502	2.87118	0.556681	93264841	0	0.545492	0.590888
LG09	2135000	5.85282	2.12207	2.75807	3.73075	65924172	0	0.454555	0.500039
LG09	2145000	2.2483	1.15452	1.9474	1.09379	5.37924e+07	1.90426e-20	0.0455033	0.0908857
LG09	2675000	0.588387	0.214256	2.74619	0.374131	96525163	0	0.363688	0.363732
LG09	18735000	0.997096	0.516362	1.931	0.480734	92530685	0	0.49997	0.500017
LG09	18935000	0.812237	0.399046	2.03544	0.41319	82745588	0	0.454522	0.454583
LG10	13225000	0.328192	0.132033	2.48569	0.19616	73608086	0	0.208319	0.208377
LG10	26795000	0.714095	0.464216	1.53828	0.249879	76429417	0	0.250035	0.250032
LG11	5000	0.353879	0.194396	1.82041	0.159483	69768160	0	0.166598	0.166634
LG11	6565000	0.508887	0.201042	2.53124	0.307844	80191121	0	0.291735	0.333301
LG12	30395000	0.472286	0.159813	2.95524	0.312473	7.62022e+07	0	0.250019	0.29165
LG13	935000	0.833412	0.542655	1.53581	0.290757	7.11681e+07	0	0.318153	0.318219
LG13	955000	0.574961	0.389416	1.47647	0.185545	6.72255e+07	0	0.181838	0.227263
LG13	965000	0.513558	0.336562	1.52589	0.176996	6.56614e+07	0	0.181748	0.181883
LG13	995000	0.654694	0.460149	1.42278	0.194544	7.33629e+07	0	0.227315	0.227306
LG13	1005000	0.633659	0.41579	1.52399	0.217869	72190214	0	0.227287	0.272718
LG13	1015000	0.607857	0.399501	1.52154	0.208356	70224104	0	0.227194	0.227326
LG13	1145000	0.755338	0.497873	1.51713	0.257465	74734202	0	0.272695	0.272666
LG13	1155000	0.651667	0.409777	1.5903	0.241889	7.26565e+07	0	0.227339	0.272655
LG13	1165000	0.687549	0.400446	1.71696	0.287103	77750484	0	0.27277	0.318165
LG13	1175000	0.597699	0.407609	1.46635	0.19009	68395965	0	0.181859	0.227225
LG13	1215000	0.860105	0.537351	1.60064	0.322754	75930144	0	0.363605	0.363686
LG13	1225000	0.964267	0.659498	1.46212	0.30477	8.23841e+07	0	0.318129	0.31821
LG13	1235000	1.91392	1.30435	1.46733	0.609566	5.74364e+07	5.56172e-74	0.227223	0.27274
LG13	2015000	0.77684	0.541205	1.43539	0.235636	67081412	0	0.227209	0.227328
LG13	2025000	0.852497	0.406746	2.0959	0.445751	8.37382e+07	0	0.454578	0.499994
LG13	2035000	0.739231	0.353078	2.09367	0.386152	77156059	0	0.409171	0.454536
LG13	3215000	0.854728	0.588087	1.45341	0.266642	7.2307e+07	0	0.27273	0.31817
LG13	4375000	0.852969	0.602744	1.41514	0.250225	7.22679e+07	0	0.272748	0.318139
LG13	5225000	1.08869	0.763296	1.4263	0.325395	74052015	0	0.363589	0.36366
LG13	5355000	0.992483	0.614989	1.61382	0.377494	8.28496e+07	0	0.409102	0.409134
LG13	5365000	0.936152	0.652371	1.435	0.283781	73404282	0	0.318169	0.318191
LG13	5515000	0.857064	0.494637	1.73271	0.362427	74957678	0	0.363618	0.363729
LG13	6935000	0.774168	0.488483	1.58484	0.285685	77624615	0	0.318149	0.318228
LG13	12985000	0.380035	0.229736	1.65422	0.150299	69805571	0	0.136399	0.181779
LG13	21285000	0.798597	0.453568	1.7607	0.345029	7.21065e+07	0	0.40912	0.454538
LG13	24815000	0.481643	0.271073	1.7768	0.21057	70802951	0	0.181826	0.227231
LG13	24825000	0.530129	0.363955	1.45658	0.166174	6.55955e+07	0	0.181809	0.181836
LG13	24925000	0.74688	0.494237	1.51118	0.252643	67764565	0	0.272659	0.272734
LG13	24955000	0.65308	0.444233	1.47013	0.208847	65219497	9.39321e-305	0.227271	0.227297
LG13	25015000	0.567757	0.388461	1.46155	0.179296	6.69331e+07	0	0.181834	0.227236
LG13	25035000	0.592513	0.411682	1.43925	0.180832	65057544	5.3903e-298	0.18179	0.181853
LG13	25045000	0.4992	0.349656	1.42769	0.149544	6.35108e+07	8.13271e-241	0.136383	0.181771
LG13	26385000	0.909445	0.639004	1.42322	0.270441	69541774	0	0.272744	0.318166
LG13	27865000	1.13291	0.783644	1.4457	0.34927	76680448	0	0.363667	0.40905
LG14	21165000	1.08147	0.712387	1.51809	0.36908	8.59296e+07	0	0.374953	0.375038
LG14	28875000	0.593649	0.342032	1.73565	0.251617	7.38523e+07	0	0.291703	0.333314
LG14	29195000	0.987593	0.653518	1.51119	0.334075	8.21669e+07	0	0.374953	0.375059
LG15	3005000	0.642123	0.249213	2.57661	0.392911	8.31606e+07	0	0.416627	0.416609
LG15	3015000	0.752429	0.449651	1.67336	0.302778	71620861	0	0.33338	0.374996
LG15	12355000	1.15328	0.679245	1.69788	0.474032	87060339	0	0.499974	0.500029
LG15	18915000	0.345257	0.16615	2.07798	0.179107	7.4877e+07	0	0.208386	0.208362
LG15	18955000	0.691206	0.423329	1.63279	0.267877	7.21318e+07	0	0.291706	0.333265
LG15	18965000	0.550978	0.329505	1.67214	0.221474	73178826	0	0.291619	0.291689
LG15	19025000	0.68669	0.391977	1.75186	0.294712	76079878	0	0.333339	0.374933
LG15	19035000	0.588333	0.239651	2.45496	0.348682	83599327	0	0.416646	0.416682
LG15	19055000	0.50662	0.307694	1.64651	0.198926	6.89184e+07	0	0.208348	0.249999
LG15	19075000	0.57173	0.20403	2.80219	0.367701	8.42613e+07	0	0.416627	0.416665
LG15	19105000	0.735593	0.311519	2.36131	0.424074	83330755	0	0.458302	0.4584
LG15	19125000	0.627258	0.196822	3.18693	0.430436	8.54311e+07	0	0.499955	0.499953
LG15	19135000	0.412984	0.097861	4.2201	0.315123	8.86761e+07	0	0.333394	0.333346
LG15	19145000	0.575484	0.211133	2.72569	0.364351	7.90773e+07	0	0.416643	0.416674
LG15	19155000	0.608127	0.168275	3.61389	0.439852	9.01665e+07	0	0.458359	0.458351
LG15	19185000	0.867905	0.525735	1.65084	0.34217	7.40423e+07	0	0.333386	0.375069
LG15	19285000	0.707825	0.405859	1.74402	0.301966	7.10462e+07	0	0.333368	0.374945
LG15	26315000	0.664813	0.391444	1.69836	0.273368	7.08873e+07	0	0.291636	0.291699
LG15	26325000	0.847103	0.518844	1.63267	0.328259	7.29972e+07	0	0.33337	0.374939
LG15	26485000	0.318581	0.182094	1.74954	0.136486	7.64791e+07	0	0.166669	0.166691
LG15	26495000	0.300112	0.148106	2.02633	0.152006	82679005	0	0.208333	0.208291
LG15	26565000	0.342278	0.189519	1.80604	0.15276	78044747	0	0.208315	0.208325
LG17	9925000	0.542764	0.29445	1.84332	0.248314	71561903	0	0.231057	0.257524
LG17	21075000	0.475752	0.277264	1.71588	0.198488	69666228	0	0.181866	0.200725
LG17	21095000	0.447119	0.224628	1.99049	0.222491	7.29664e+07	0	0.227259	0.227285
LG17	21105000	0.677128	0.302236	2.24039	0.374891	8.03766e+07	0	0.409083	0.409149
LG17	21115000	0.588364	0.32868	1.79008	0.259684	71863204	0	0.24239	0.272723
LG17	21415000	0.329417	0.108897	3.02502	0.22052	80542176	0	0.22723	0.227315
LG17	21425000	0.4591	0.109856	4.17912	0.349244	85943986	0	0.397689	0.409082
LG17	21435000	0.290235	0.0706429	4.10847	0.219592	82717783	0	0.227207	0.22726
LG17	21445000	0.45305	0.0721053	6.28317	0.380945	9.2623e+07	0	0.409066	0.409064
LG17	21455000	0.686377	0.343332	1.99916	0.343044	7.76941e+07	0	0.409068	0.416623
LG17	21465000	0.65578	0.374704	1.75013	0.281076	73555061	0	0.329497	0.344651
LG17	21475000	0.573038	0.307148	1.86567	0.26589	7.25763e+07	0	0.291621	0.318186
LG17	21825000	0.714424	0.299149	2.38819	0.415275	82407429	0	0.454555	0.462122
LG17	21845000	0.75847	0.410696	1.84679	0.347773	7.66161e+07	0	0.36371	0.386335
LG17	21855000	0.745725	0.415596	1.79435	0.330129	74907773	0	0.340925	0.363655
LG17	22345000	1.16894	0.666025	1.7551	0.502913	8.72776e+07	0	0.522727	0.537863
LG17	22355000	0.957922	0.481023	1.99143	0.4769	79050970	0	0.530239	0.553064
LG17	22375000	1.09484	0.565585	1.93576	0.529251	8.77417e+07	0	0.560679	0.579549
LG17	22385000	1.20963	0.695039	1.74038	0.51459	88313825	0	0.54917	0.556846
LG17	22405000	1.15974	0.552199	2.10022	0.60754	91661345	0	0.640094	0.655245
LG17	22415000	1.09455	0.564256	1.93981	0.530294	86737514	0	0.549207	0.568127
LG17	22475000	1.05561	0.560165	1.88447	0.495448	8.37411e+07	0	0.537846	0.556785
LG17	25805000	0.705952	0.369476	1.91069	0.336477	7.80107e+07	0	0.340938	0.367414
LG17	25815000	0.683963	0.380945	1.79544	0.303018	74166481	0	0.333313	0.352281
LG17	25845000	0.778281	0.453625	1.71569	0.324656	74774351	0	0.340936	0.363683
LG17	25855000	0.8136	0.475877	1.70968	0.337723	7.21e+07	0	0.36748	0.393917
LG17	25915000	0.841152	0.465824	1.80573	0.375328	7.64068e+07	0	0.401458	0.424266
LG17	29135000	0.910727	0.52981	1.71897	0.380918	8.50679e+07	0	0.371237	0.386366
LG17	29275000	0.871981	0.504425	1.72866	0.367556	8.09214e+07	0	0.382634	0.397777
LG17	29485000	0.976575	0.547395	1.78404	0.42918	77945017	0	0.458328	0.481055
LG18	5195000	1.01459	0.44076	2.30191	0.573829	94183716	0	0.583316	0.594713
LG18	5215000	1.10339	0.47704	2.313	0.626354	86161650	0	0.685641	0.70453
LG18	5225000	1.01458	0.482606	2.10231	0.531979	84317032	0	0.57574	0.598533
LG18	18325000	0.573647	0.00987401	58.0967	0.563773	9.80457e+07	0	0.590863	0.590942
LG18	27785000	0.363132	0.176424	2.05829	0.186708	70616376	0	0.166743	0.181862
LG18	27795000	0.526434	0.256912	2.04908	0.269522	74383141	0	0.318207	0.333377
LG18	27935000	0.710583	0.350386	2.028	0.360198	8.73601e+07	0	0.378825	0.393863
LG19	10685000	0.424548	0.177895	2.38652	0.246654	78066732	0	0.227292	0.23108
LG19	13975000	0.944887	0.508412	1.85851	0.436476	84397484	0	0.443152	0.458346
LG19	18615000	0.929521	0.521448	1.78258	0.408073	7.88852e+07	0	0.450765	0.47347
LG19	20585000	1.20172	0.653051	1.84016	0.548665	8.81876e+07	0	0.556808	0.575727
LG19	20595000	1.07791	0.627941	1.71659	0.449974	8.50711e+07	0	0.473459	0.492381
LG19	20675000	1.26812	0.72911	1.73927	0.539013	9.11303e+07	0	0.56062	0.572029
LG19	20685000	1.10563	0.565902	1.95376	0.539733	88156478	0	0.549305	0.568158
LG19	20695000	1.25704	0.738039	1.70322	0.519004	8.71446e+07	0	0.522677	0.537938
LG19	20705000	1.09505	0.57058	1.91919	0.524474	8.46136e+07	0	0.58328	0.598488
LG19	20715000	1.18436	0.658497	1.79859	0.525867	91537237	0	0.522777	0.541659
LG19	20725000	0.991787	0.582583	1.7024	0.409204	75567110	0	0.439363	0.462167
LG19	20745000	1.19514	0.679128	1.75981	0.516007	89848194	0	0.541686	0.560536
LG19	20755000	1.15537	0.543996	2.12386	0.611375	9.0968e+07	0	0.655255	0.674268
LG19	20765000	1.14149	0.6229	1.83255	0.518595	84810252	0	0.54926	0.568206
LG19	20805000	1.2353	0.658155	1.87692	0.577149	90853252	0	0.609854	0.621226
LG19	20825000	1.37062	0.734093	1.86709	0.636524	96815144	0	0.625053	0.643898
LG19	20915000	1.17781	0.609256	1.9332	0.568558	9.20472e+07	0	0.587132	0.602269
LG19	20925000	1.09206	0.585416	1.86545	0.506647	83707086	0	0.541704	0.564364
LG19	21075000	0.826749	0.466333	1.77287	0.360417	7.50302e+07	0	0.378771	0.401491
LG19	21115000	1.18081	0.689889	1.7116	0.490924	84834938	0	0.537933	0.553101
LG19	21135000	1.03409	0.605835	1.70688	0.428252	8.46553e+07	0	0.420505	0.439393
LG19	21445000	1.15716	0.641815	1.80294	0.515342	85965737	0	0.545432	0.564418
LG19	21465000	0.879876	0.472978	1.86029	0.406898	75102084	0	0.454493	0.47725
LG19	21475000	1.14331	0.622738	1.83594	0.520571	8.82769e+07	0	0.545432	0.55683
LG20	5000	2.04346	1.26304	1.61789	0.780417	5.79487e+07	9.85298e-85	0.0416748	0.0832875
LG20	9035000	1.04475	0.599486	1.74274	0.44526	8.54325e+07	0	0.458295	0.45838
LG20	9045000	0.969382	0.603327	1.60673	0.366055	8.1352e+07	0	0.41666	0.416601
LG20	9055000	0.968695	0.545937	1.77437	0.422758	7.77791e+07	0	0.458396	0.499964
LG20	9065000	1.05555	0.513774	2.05451	0.541779	8.99106e+07	0	0.583348	0.583352
LG22	1175000	0.58341	0.212711	2.74274	0.370699	8.82906e+07	0	0.363664	0.363663
LG23	7725000	0.350015	0.194135	1.80295	0.15588	71343368	0	0.166709	0.181765
LG23	14395000	0.745712	0.396885	1.87891	0.348826	7.56344e+07	0	0.363651	0.378849
LG23	15295000	0.871772	0.358364	2.43264	0.513408	91510164	0	0.518992	0.534066
LG23	16705000	0.53207	0.279993	1.9003	0.252077	7.29891e+07	0	0.272728	0.295489
LG23	17575000	0.601294	0.33095	1.81687	0.270344	76987841	0	0.257555	0.280258
LG23	18455000	0.379348	0.182532	2.07826	0.196817	7.7234e+07	0	0.212078	0.231102
LG23	18975000	0.362282	0.151764	2.38714	0.210518	77568900	0	0.227237	0.227347
LG23	19025000	0.431452	0.100173	4.30706	0.331279	8.98891e+07	0	0.337148	0.363633
LG23	19035000	0.655225	0.254041	2.57921	0.401184	82653508	0	0.409181	0.427957
LG23	19045000	0.587409	0.167612	3.50457	0.419797	87724028	0	0.458379	0.473471
LG23	19055000	0.640413	0.24333	2.63187	0.397083	7.92848e+07	0	0.412843	0.431813
LG23	19065000	0.422276	0.0385628	10.9503	0.383713	91806502	0	0.36366	0.405324
LG23	19075000	0.530742	0.0123779	42.8781	0.518364	96634440	0	0.545474	0.545473
LG23	19085000	0.537351	0.0205938	26.0929	0.516757	95673612	0	0.545534	0.545461
LG23	19105000	0.574438	0.00382462	150.195	0.570613	99395533	0	0.59088	0.59085
LG23	19115000	0.66457	0.213466	3.11323	0.451104	8.32643e+07	0	0.590866	0.590918
LG23	19125000	0.67451	0.226107	2.98315	0.448403	8.20754e+07	0	0.545444	0.545509
LG23	19135000	0.348833	0.0123488	28.2484	0.336485	78803236	0	0.272766	0.348426
LG23	19145000	0.433488	0.00649518	66.74	0.426993	8.99343e+07	0	0.499931	0.500049
LG23	19155000	0.58346	0.00254141	229.581	0.580918	98531013	0	0.590962	0.590912
LG23	19175000	0.78209	0.276693	2.82656	0.505397	87549171	0	0.560589	0.571977
LG23	19185000	0.487356	0.01684	28.9404	0.470516	95183910	0	0.500036	0.503805

## Sheet: LunzuaLakeLzL_F
Linkage_Group	pos	FmedianNormalWind	MmedianNormalWind	ratiomedianNormWind_FM	differenceNormWind_FM	Wilcox_statist	Wilcox_p_value	Wilcox_confint1	Wilcox_confint2
LG02	10845000	0.375637	0.218128	1.72209	0.157509	62036968	7.31632e-199	0.0833641	0.0833528
LG02	10895000	0.48206	0.230687	2.08967	0.251373	66522888	0	0.166691	0.216656
LG02	10965000	0.352348	0.19738	1.78512	0.154968	6.5842e+07	0	0.116637	0.133391
LG02	11205000	0.28633	0.161174	1.77653	0.125156	65978919	0	0.083383	0.133284
LG02	18675000	0.310036	0.193091	1.60565	0.116945	60811208	1.12366e-157	0.0832745	0.0832829
LG02	18725000	0.307311	0.169073	1.81762	0.138238	6.14919e+07	2.67548e-196	1.82878e-05	0.0499836
LG02	18845000	0.736285	0.369613	1.99204	0.366672	7.89926e+07	0	0.38337	0.400031
LG02	19755000	0.515715	0.312219	1.65177	0.203496	6.4944e+07	7.24132e-296	0.166706	0.199978
LG02	19865000	0.359906	0.20395	1.76468	0.155956	63838672	2.86629e-260	0.116668	0.133352
LG02	19895000	0.303111	0.139126	2.17868	0.163985	6.89314e+07	0	0.149997	0.15002
LG02	21415000	0.567743	0.324158	1.75144	0.243586	7.01301e+07	0	0.283366	0.316611
LG03	14715000	0.40476	0.0249308	16.2353	0.379829	74547326	0	0.125003	0.249992
LG03	15285000	0.728352	0.13297	5.47757	0.595382	8.36927e+07	0	0.499983	0.50002
LG03	19035000	0.613114	0.0802753	7.63764	0.532838	8.66963e+07	0	0.499957	0.499998
LG03	22455000	0.307644	0.0558444	5.50895	0.2518	8.48103e+07	0	0.249974	0.249974
LG03	22865000	0.286584	0.00531614	53.9083	0.281268	75093440	0	0.124933	0.124954
LG03	23005000	0.680469	0.0547612	12.4261	0.625708	87920389	0	0.624945	0.624973
LG03	23185000	0.563944	0.0917908	6.14379	0.472153	87386467	0	0.458343	0.458342
LG03	23405000	0.436456	0.0791588	5.51368	0.357298	7.50469e+07	0	0.249945	0.250094
LG03	23595000	0.364314	0.0122321	29.7834	0.352081	8.67595e+07	0	0.374963	0.374984
LG03	23615000	0.301082	0.0256641	11.7317	0.275418	82054113	0	0.249989	0.249939
LG03	23655000	0.424183	0.0649268	6.53324	0.359256	81979387	0	0.250022	0.333425
LG03	27335000	0.837966	0.115055	7.28317	0.722911	9.15375e+07	0	0.749979	0.750077
LG03	27345000	0.455504	0.0554111	8.22045	0.400093	8.3046e+07	0	0.374933	0.374928
LG03	27725000	0.391986	0.0564277	6.94669	0.335558	80907802	0	0.250021	0.250005
LG04	9815000	0.556161	0.212289	2.61983	0.343872	7.31264e+07	0	0.333343	0.383285
LG04	10025000	0.422233	0.0456054	9.25839	0.376627	77727214	0	0.250082	0.250037
LG04	10075000	0.316743	0.0756624	4.18627	0.241081	67307314	0	0.0832929	0.0833923
LG04	11205000	0.299562	0.10092	2.96831	0.198642	7.37482e+07	0	0.166753	0.183398
LG04	12465000	0.809177	0.366153	2.20994	0.443024	76175859	0	0.466648	0.483351
LG04	13265000	0.619538	0.173203	3.57695	0.446335	79312517	0	0.416604	0.416678
LG04	13275000	0.311194	0.10158	3.06354	0.209614	70995978	0	0.166639	0.166627
LG04	13285000	0.39691	0.143076	2.77413	0.253835	73421950	0	0.166675	0.216641
LG04	15125000	0.731952	0.214459	3.41302	0.517493	86419568	0	0.550031	0.566724
LG04	15155000	0.675141	0.156374	4.31746	0.518766	91293929	0	0.483392	0.499978
LG04	15165000	0.428874	0.118878	3.60768	0.309996	8.07882e+07	0	0.33327	0.333281
LG04	15195000	0.522823	0.219808	2.37854	0.303015	7.04781e+07	0	0.249972	0.250085
LG04	22905000	0.496975	0.223668	2.22194	0.273308	6.90111e+07	0	0.233337	0.25006
LG04	22915000	0.745725	0.227897	3.2722	0.517828	87685789	0	0.499957	0.516665
LG05	2635000	0.448097	0.274813	1.63055	0.173284	63401626	5.9261e-240	0.13338	0.166621
LG05	2795000	0.798079	0.463734	1.72098	0.334345	7.00476e+07	0	0.300012	0.333333
LG05	12595000	0.518756	0.30487	1.70157	0.213887	6.59424e+07	0	0.1833	0.216631
LG05	16845000	0.747175	0.366763	2.03721	0.380412	80351722	0	0.383286	0.399964
LG05	16955000	0.322034	0.134817	2.38869	0.187218	7.22353e+07	0	0.166648	0.166713
LG05	16965000	0.500425	0.260264	1.92276	0.240161	7.39748e+07	0	0.250022	0.266742
LG06	3295000	0.390953	0.209019	1.87042	0.181933	6.90622e+07	0	0.166636	0.166689
LG06	3305000	0.480994	0.186431	2.58	0.294562	74799745	0	0.250009	0.299943
LG06	16975000	0.388803	0.211179	1.84111	0.177624	64556719	8.37585e-287	0.116734	0.149986
LG06	19465000	0.79587	0.331037	2.40417	0.464834	7.93906e+07	0	0.483386	0.500015
LG07	19685000	0.713262	0.430397	1.65722	0.282865	67518521	0	0.250043	0.283356
LG07	31085000	0.608447	0.390981	1.55621	0.217467	64909969	1.42882e-304	0.166679	0.233351
LG07	31305000	0.69518	0.419158	1.65852	0.276022	67841808	0	0.266586	0.299941
LG07	32075000	0.846365	0.525177	1.61158	0.321188	7.37557e+07	0	0.333373	0.366661
LG07	38625000	0.832883	0.543766	1.5317	0.289118	6.92062e+07	0	0.283288	0.31665
LG07	48225000	0.71837	0.414749	1.73206	0.303621	74208694	0	0.333301	0.349935
LG08	18835000	0.373196	0.239756	1.55657	0.13344	5.93815e+07	9.7193e-123	0.0665742	0.0832907
LG09	1125000	0.755799	0.376352	2.00822	0.379447	7.67153e+07	0	0.383358	0.416658
LG09	1155000	0.331475	0.10159	3.26288	0.229885	77654981	0	0.216726	0.233364
LG09	1735000	0.421025	0.211559	1.99011	0.209466	67115094	0	0.166646	0.166696
LG09	1935000	0.360172	0.165253	2.17951	0.194919	63902978	2.5964e-265	0.0833723	0.133302
LG09	2795000	0.317468	0.157764	2.0123	0.159704	6.86023e+07	0	0.149956	0.166618
LG09	3235000	0.881262	0.452675	1.94679	0.428587	79883549	0	0.450064	0.466699
LG09	17835000	0.357698	0.0460054	7.77512	0.311692	85329947	0	0.333292	0.3333
LG10	5000	1.05525	0.59669	1.76851	0.45856	7.88152e+07	0	0.499962	0.516716
LG10	15000	1.02946	0.680742	1.51226	0.348713	7.03222e+07	0	0.400036	0.433376
LG10	25000	0.998309	0.426007	2.34341	0.572301	7.95145e+07	0	0.633359	0.666663
LG10	35000	0.929874	0.483112	1.92476	0.446762	7.72103e+07	0	0.499962	0.516631
LG10	45000	1.0554	0.513609	2.05488	0.541794	77950446	0	0.566679	0.599985
LG10	55000	1.05094	0.559694	1.8777	0.491243	76481271	0	0.533394	0.566673
LG10	65000	1.01882	0.49706	2.0497	0.521763	80367396	0	0.54996	0.566713
LG10	11555000	0.808677	0.482842	1.67483	0.325836	7.04849e+07	0	0.35005	0.383347
LG10	11565000	0.743742	0.469633	1.58367	0.274109	6.74759e+07	0	0.299969	0.333312
LG10	14715000	0.566118	0.267603	2.11551	0.298515	7.56546e+07	0	0.316718	0.333326
LG10	14755000	0.552086	0.194111	2.84419	0.357976	80560997	0	0.333344	0.38333
LG10	14765000	0.437273	0.239466	1.82603	0.197807	7.03336e+07	0	0.233353	0.249971
LG10	18035000	0.508641	0.266793	1.9065	0.241847	6.97467e+07	0	0.233309	0.249991
LG10	18055000	0.472019	0.254135	1.85736	0.217885	71970943	0	0.249954	0.249981
LG10	18095000	0.414509	0.169503	2.44543	0.245005	72633268	0	0.166706	0.166693
LG10	25225000	0.620471	0.314349	1.97383	0.306123	7.15587e+07	0	0.299922	0.316698
LG10	26795000	0.298395	0.169913	1.75616	0.128482	6.3574e+07	1.16145e-251	0.0833989	0.083338
LG10	26805000	0.506324	0.292961	1.7283	0.213364	6.82442e+07	0	0.216732	0.233354
LG10	27005000	0.488518	0.315158	1.55007	0.173359	6.24462e+07	1.7116e-208	0.150047	0.166679
LG10	27055000	0.479494	0.258304	1.85631	0.22119	6.78859e+07	0	0.216629	0.233332
LG10	27065000	0.465678	0.159154	2.92596	0.306524	83410110	0	0.316589	0.316681
LG10	27075000	0.759582	0.452205	1.67973	0.307378	73287009	0	0.333301	0.34999
LG10	27095000	0.596632	0.358514	1.66418	0.238118	7.29149e+07	0	0.24994	0.266647
LG10	27105000	0.670475	0.416388	1.61021	0.254086	70126511	0	0.266625	0.283358
LG10	27125000	0.587116	0.368803	1.59195	0.218313	6.3552e+07	1.36903e-246	0.16668	0.183389
LG10	27135000	0.675757	0.30003	2.2523	0.375727	8.07497e+07	0	0.400044	0.416679
LG11	25000	0.312735	0.158054	1.97866	0.154681	63643998	1.34865e-257	0.0833134	0.0833942
LG11	9425000	1.01799	0.516048	1.97266	0.501941	80781906	0	0.516721	0.549986
LG11	12745000	1.19406	0.541836	2.20372	0.65222	86655630	0	0.650027	0.683304
LG11	12795000	1.00012	0.470953	2.1236	0.529164	80016107	0	0.55005	0.583267
LG11	12805000	1.00874	0.464824	2.17016	0.543917	83926777	0	0.583283	0.60005
LG11	18715000	0.460462	0.244816	1.88085	0.215647	6.55e+07	0	0.166662	0.166702
LG11	23095000	0.707404	0.348095	2.03221	0.359309	7.43078e+07	0	0.400034	0.416733
LG11	28385000	0.465903	0.210259	2.21586	0.255644	6.93886e+07	0	0.216713	0.249993
LG13	135000	0.827526	0.39975	2.07011	0.427776	79528928	0	0.433314	0.450064
LG13	145000	0.884345	0.549445	1.60952	0.3349	74607023	0	0.349941	0.366633
LG13	1945000	0.514057	0.30381	1.69204	0.210247	65909911	0	0.166696	0.200066
LG13	1955000	0.693014	0.29788	2.32649	0.395134	75044047	0	0.383279	0.400017
LG13	3035000	0.892969	0.636476	1.40299	0.256493	66490547	0	0.249945	0.266739
LG13	3055000	0.995692	0.639286	1.55751	0.356406	72716394	0	0.350047	0.383251
LG13	3865000	0.480244	0.328047	1.46395	0.152196	6.40215e+07	7.16805e-260	0.150032	0.166628
LG13	3905000	0.484202	0.251385	1.92614	0.232817	66735198	0	0.166641	0.166719
LG13	27075000	0.947339	0.655574	1.44505	0.291764	70887809	0	0.316681	0.333351
LG14	27655000	0.777497	0.49611	1.56719	0.281387	6.96022e+07	0	0.250001	0.266667
LG15	19155000	0.386953	0.227847	1.6983	0.159106	61699925	8.86425e-196	0.0833185	0.0833026
LG15	23385000	0.311436	0.125527	2.48102	0.185908	6.92635e+07	0	0.133321	0.166625
LG15	27085000	1.20125	0.749405	1.60294	0.45185	79361237	0	0.416733	0.433373
LG16	3195000	0.698805	0.169993	4.11079	0.528812	89216212	0	0.566624	0.566686
LG16	5755000	0.765973	0.424098	1.80613	0.341876	71770527	0	0.333319	0.350023
LG16	9315000	0.657909	0.315558	2.0849	0.342351	73675983	0	0.300074	0.333252
LG16	10525000	0.510866	0.289051	1.76739	0.221814	67533699	0	0.233328	0.249991
LG16	16885000	0.303453	0.176062	1.72355	0.127391	67664160	0	0.133359	0.15005
LG16	21285000	0.339924	0.176712	1.9236	0.163212	7.48414e+07	0	0.166628	0.16666
LG17	985000	0.607489	0.317798	1.91156	0.289691	72562330	0	0.333313	0.333379
LG17	995000	0.902568	0.525277	1.71827	0.377291	69907149	0	0.366732	0.399973
LG17	20975000	0.776172	0.440686	1.76128	0.335486	7.25591e+07	0	0.333383	0.366714
LG18	2855000	0.529155	0.225997	2.34142	0.303158	7.57392e+07	0	0.300041	0.316694
LG18	18185000	0.435115	0.171423	2.53825	0.263692	7.25965e+07	0	0.216699	0.249994
LG18	22075000	0.804378	0.384122	2.09407	0.420256	83524603	0	0.433357	0.450028
LG18	22095000	0.59679	0.268783	2.22034	0.328007	77562993	0	0.333343	0.350027
LG18	22135000	0.703988	0.321578	2.18917	0.38241	80154238	0	0.36672	0.383379
LG18	28155000	0.405859	0.161144	2.51862	0.244716	#N/A	#N/A	#N/A	#N/A
LG18	28165000	0.307186	0.136006	2.25861	0.17118	#N/A	#N/A	#N/A	#N/A
LG19	6005000	0.371796	0.141336	2.63059	0.23046	76929916	0	0.166744	0.249941
LG19	11655000	1.04307	0.581072	1.79508	0.461999	7.22434e+07	0	0.583328	0.583384
LG20	385000	0.717887	0.467383	1.53597	0.250503	6.96545e+07	0	0.283267	0.300024
LG20	1785000	0.313427	0.176832	1.77245	0.136595	63021598	1.40932e-232	0.0833305	0.0833558
LG20	1805000	0.30277	0.0642836	4.70991	0.238486	78438563	0	0.166738	0.166709
LG20	1915000	0.874713	0.571673	1.53009	0.30304	6.74419e+07	0	0.299973	0.333292
LG20	3455000	0.322201	0.178712	1.80291	0.143489	61581495	4.34178e-188	0.0833119	0.0832712
LG20	3485000	0.454838	0.294321	1.54538	0.160517	6.27022e+07	9.91622e-217	0.133243	0.166616
LG20	3595000	0.496084	0.185591	2.67299	0.310492	79150750	0	0.316642	0.333276
LG20	3615000	0.449597	0.145815	3.08333	0.303781	75936223	0	0.249937	0.249994
LG20	13535000	0.436323	0.176702	2.46925	0.259621	7.6217e+07	0	0.249945	0.250041
LG20	16565000	0.31441	0.149145	2.10808	0.165265	69899740	0	0.14997	0.16663
LG20	20875000	0.733668	0.469903	1.56132	0.263765	65095504	2.73761e-301	0.249959	0.283359
LG22	3095000	0.474669	0.09982	4.75525	0.374849	8.32462e+07	0	0.333397	0.333357
LG22	3105000	0.555953	0.129447	4.29483	0.426506	8.68467e+07	0	0.416729	0.416707
LG22	3115000	0.374513	0.0745625	5.0228	0.29995	82588542	0	0.31663	0.333319
LG23	1455000	0.301545	0.127397	2.36696	0.174148	71591765	0	0.166638	0.166639
LG23	1475000	0.719611	0.326297	2.20539	0.393314	8.19753e+07	0	0.383296	0.399932
LG23	1485000	0.538296	0.252325	2.13335	0.285971	7.24363e+07	0	0.250006	0.283373
LG23	1495000	0.592374	0.30228	1.95969	0.290094	7.2471e+07	0	0.249977	0.250056
LG23	8075000	0.41905	0.214639	1.95235	0.204411	6.95314e+07	0	0.166655	0.1667
LG23	8735000	0.456229	0.214309	2.12884	0.241921	6.95373e+07	0	0.216644	0.233318
LG23	9595000	0.409892	0.225907	1.81443	0.183985	65906236	0	0.15005	0.16663
LG23	9625000	0.302203	0.163814	1.8448	0.138389	6.57986e+07	0	0.0833524	0.10005
LG23	9645000	0.257366	0.0457254	5.62851	0.211641	7.75596e+07	0	0.166657	0.166706
LG23	9655000	0.395802	0.20371	1.94297	0.192092	6.62563e+07	0	0.166596	0.166661
LG23	19585000	0.52109	0.254965	2.04377	0.266125	67417224	0	0.233371	0.250021
LG23	19595000	0.35119	0.10319	3.40334	0.248	6.69892e+07	0	0.149928	0.166578
LG23	29145000	0.379637	0.208309	1.82247	0.171328	6.4036e+07	8.42913e-269	0.0999957	0.133385

## Sheet: LunzuaRiverLz1_F
Linkage_Group	pos	FmedianNormalWind	MmedianNormalWind	ratiomedianNormWind_FM	differenceNormWind_FM	Wilcox_statist	Wilcox_p_value	Wilcox_confint1	Wilcox_confint2
LG01	18755000	0.388503	0.223778	1.73611	0.164725	68216162	0	0.149986	0.150034
LG02	10975000	0.648743	0.394291	1.64534	0.254453	73011484	0	0.250029	0.266731
LG02	18395000	0.405568	0.238536	1.70024	0.167032	6.36338e+07	9.90651e-249	0.11662	0.133351
LG02	18465000	0.259574	0.161974	1.60257	0.0976002	6.27553e+07	5.13211e-236	0.0666955	0.0833149
LG02	18825000	0.384853	0.19917	1.93228	0.185683	70666082	0	0.183372	0.216643
LG02	21085000	0.347232	0.148335	2.34086	0.198897	75391785	0	0.233288	0.249964
LG03	20035000	1.15877	0.225177	5.14604	0.933594	9.13598e+07	0	0.999977	0.999947
LG03	20055000	0.800482	0.0301803	26.5233	0.770302	94145183	0	0.749949	0.749935
LG03	24815000	0.469791	0.0497284	9.44713	0.420062	8.51425e+07	0	0.375036	0.375045
LG03	26335000	0.427407	0.0607439	7.03621	0.366663	8.01158e+07	0	0.250035	0.250048
LG03	27975000	0.306382	0.0505949	6.05558	0.255787	7.72537e+07	0	0.125044	0.125052
LG05	1815000	0.848345	0.471203	1.80038	0.377142	7.51155e+07	0	0.300052	0.399917
LG05	2645000	0.914559	0.40281	2.27045	0.511749	78871318	0	0.500019	0.599995
LG05	2675000	0.656934	0.376472	1.74497	0.280462	64130014	2.43961e-265	0.200063	0.200029
LG05	24165000	0.690981	0.209959	3.29103	0.481022	7.62921e+07	0	0.499976	0.500002
LG05	24175000	0.989131	0.491441	2.01272	0.49769	8.14985e+07	0	0.499971	0.500033
LG06	135000	0.914339	0.49923	1.8315	0.415108	7.41751e+07	0	0.499947	0.499959
LG06	4875000	0.783922	0.422228	1.85663	0.361694	7.16272e+07	0	0.399989	0.39995
LG06	4885000	0.970353	0.521448	1.86088	0.448905	73224921	0	0.400001	0.499917
LG06	6945000	0.527567	0.247165	2.13447	0.280402	75171549	0	0.299988	0.299968
LG07	3295000	0.453221	0.237206	1.91066	0.216015	7.25347e+07	0	0.233292	0.24998
LG07	22785000	0.618855	0.29869	2.0719	0.320165	75612912	0	0.333258	0.333336
LG07	22845000	0.722144	0.471903	1.53028	0.250242	71072882	0	0.316665	0.333328
LG07	30885000	0.459496	0.269853	1.70276	0.189643	74776918	0	0.199953	0.21666
LG07	44725000	0.360664	0.176722	2.04085	0.183942	75195863	0	0.166734	0.166725
LG08	135000	0.992521	0.611309	1.6236	0.381212	7.08261e+07	0	0.399953	0.400016
LG08	705000	0.99559	0.609029	1.63472	0.386561	7.1486e+07	0	0.400002	0.499981
LG08	1515000	0.632177	0.359374	1.75911	0.272803	7.10746e+07	0	0.299962	0.299979
LG08	1525000	1.04351	0.677572	1.54007	0.365933	7.0187e+07	0	0.399911	0.400019
LG08	1545000	0.69533	0.342376	2.0309	0.352955	7.79199e+07	0	0.300024	0.399947
LG08	1555000	0.451285	0.190271	2.3718	0.261014	7.42668e+07	0	0.299978	0.299916
LG08	1915000	1.09226	0.663574	1.64603	0.428687	7.43278e+07	0	0.400059	0.499991
LG08	1925000	1.27961	0.814089	1.57183	0.465523	77086329	0	0.499951	0.499962
LG08	1935000	1.01437	0.627597	1.61627	0.386771	74760170	0	0.400083	0.400015
LG08	1945000	0.851635	0.530257	1.60608	0.321378	7.03011e+07	0	0.300026	0.399966
LG08	4695000	1.24519	0.820578	1.51745	0.424608	74478245	0	0.400031	0.499992
LG08	7135000	0.946435	0.607979	1.55669	0.338456	6.86492e+07	0	0.399981	0.399962
LG08	10025000	1.25211	0.622808	2.01044	0.629307	8.16073e+07	0	0.699955	0.699983
LG08	10035000	1.06778	0.439856	2.42757	0.627927	84286513	0	0.600073	0.699966
LG08	13225000	1.0034	0.663344	1.51264	0.340056	70137815	0	0.399936	0.400037
LG08	13235000	0.924748	0.386461	2.39286	0.538286	88053521	0	0.599965	0.599923
LG08	13425000	0.733217	0.485951	1.50883	0.247265	6.71724e+07	0	0.299977	0.300041
LG08	13465000	0.730567	0.407559	1.79254	0.323008	71714112	0	0.399975	0.399975
LG08	14235000	0.679422	0.369303	1.83974	0.310119	7.12012e+07	0	0.300007	0.300044
LG08	14245000	0.725407	0.457094	1.587	0.268313	66766131	0	0.299928	0.299971
LG09	1125000	0.49925	0.167953	2.97255	0.331297	64509518	2.53672e-306	0.0999998	0.0999797
LG09	1935000	0.39973	0.10006	3.9949	0.29967	71762142	0	0.10001	0.100044
LG09	1945000	0.591461	0.232647	2.54231	0.358814	7.56921e+07	0	0.399964	0.400042
LG09	1955000	0.578272	0.0847815	6.82073	0.493491	81718169	0	0.399976	0.399972
LG09	2135000	0.70259	0.349635	2.00949	0.352955	7.23445e+07	0	0.400042	0.400014
LG09	2585000	1.05295	0.543056	1.93894	0.509899	7.68644e+07	0	0.599967	0.600007
LG09	2675000	0.749635	0.339066	2.21088	0.410569	7.44808e+07	0	0.399939	0.400061
LG09	2705000	0.520448	0.0478152	10.8846	0.472633	87304471	0	0.400065	0.40005
LG09	2715000	0.258794	0.0911709	2.83856	0.167623	5.91792e+07	1.94769e-145	1.25911e-05	1.40449e-05
LG09	2755000	0.434377	0.179022	2.42639	0.255354	6.70797e+07	0	0.100008	0.199938
LG09	2775000	0.268063	0.116288	2.30516	0.151775	6.73152e+07	0	0.0999507	0.0999803
LG09	2785000	0.39572	0.185121	2.13763	0.210599	6.53137e+07	0	0.100031	0.100013
LG09	2865000	0.769963	0.40014	1.92423	0.369823	75288858	0	0.39999	0.399914
LG09	3055000	0.425707	0.172573	2.46683	0.253135	7.22464e+07	0	0.200019	0.200018
LG09	3085000	0.858294	0.358244	2.39584	0.50005	79493404	0	0.499984	0.500023
LG09	3755000	1.16368	0.361974	3.21483	0.80171	9.009e+07	0	0.799962	0.800089
LG09	3765000	1.28025	0.590881	2.16668	0.689371	87035971	0	0.699986	0.70007
LG10	7715000	0.465623	0.306079	1.52125	0.159544	6.74049e+07	0	0.199987	0.199994
LG10	8825000	0.331647	0.0833917	3.97698	0.248255	83931086	0	0.200002	0.299972
LG10	10905000	1.20166	0.752015	1.59792	0.449645	78951578	0	0.499984	0.50003
LG10	11515000	0.759404	0.358564	2.1179	0.40084	77790703	0	0.400007	0.400019
LG10	11525000	0.872573	0.562484	1.55129	0.310089	6.96822e+07	0	0.300032	0.4
LG10	13045000	0.988401	0.622628	1.58747	0.365773	70088679	0	0.399922	0.400065
LG10	13285000	1.44354	0.885601	1.63001	0.557934	7.90694e+07	0	0.599986	0.600049
LG10	13315000	1.05729	0.663174	1.59429	0.394121	7.13328e+07	0	0.399955	0.400032
LG10	20725000	1.11449	0.626057	1.78017	0.488431	78895991	0	0.500033	0.500024
LG10	20825000	1.37242	0.834987	1.64365	0.537436	8.38175e+07	0	0.500011	0.599948
LG10	25805000	0.688041	0.452535	1.52042	0.235506	67510339	0	0.200009	0.299969
LG10	25845000	0.921778	0.613869	1.50159	0.307909	70420992	0	0.300038	0.300005
LG10	27175000	0.534497	0.354275	1.50871	0.180222	64292939	2.67431e-271	0.19998	0.199958
LG10	27295000	0.380712	0.228527	1.66594	0.152185	6.71462e+07	0	0.100073	0.199931
LG10	27315000	0.270413	0.170703	1.58411	0.09971	60546824	9.97997e-161	8.58892e-07	5.42464e-05
LG10	27475000	0.341276	0.215808	1.58138	0.125467	6.37034e+07	1.35843e-306	2.51438e-06	2.65339e-05
LG11	17255000	1.00045	0.542726	1.84338	0.457724	7.61316e+07	0	0.499982	0.500056
LG11	22825000	0.644276	0.30078	2.14202	0.343496	7.00794e+07	0	0.399991	0.39998
LG11	29805000	0.433967	0.189321	2.29223	0.244646	72796497	0	0.200071	0.299962
LG12	25845000	1.12863	0.364314	3.09796	0.764314	8.78172e+07	0	0.80001	0.899999
LG12	26535000	0.638156	0.259934	2.45507	0.378222	7.10819e+07	0	0.300057	0.399983
LG12	26545000	0.749525	0.0453755	16.5183	0.70415	92874270	0	0.700037	0.700028
LG12	26555000	0.6955	0.254965	2.72783	0.440536	7.80455e+07	0	0.400037	0.400012
LG12	26935000	0.871983	0.349835	2.49255	0.522148	8.02903e+07	0	0.500014	0.500047
LG12	29775000	0.252975	0.0932207	2.71372	0.159754	6.94803e+07	0	0.0999538	0.100037
LG12	29795000	0.312529	0.0691531	4.51938	0.243376	74648859	0	0.199984	0.199963
LG13	1955000	0.288538	0.178382	1.61753	0.110156	55445678	5.51618e-44	3.63781e-05	9.09355e-05
LG13	3985000	0.341358	0.223998	1.52393	0.11736	62005954	5.12445e-201	0.0832962	0.0833744
LG13	11675000	0.919333	0.572683	1.60531	0.34665	6.89429e+07	0	0.366707	0.400075
LG13	18885000	0.981527	0.629627	1.5589	0.3519	7.21194e+07	0	0.349989	0.366696
LG13	19725000	0.676307	0.481782	1.40376	0.194526	6.11429e+07	2.45017e-165	0.166642	0.183371
LG13	27965000	1.1607	0.729967	1.59007	0.430734	64519330	8.07429e-278	0.33341	0.399961
LG14	11215000	0.855573	0.559904	1.52807	0.295669	6.99709e+07	0	0.316619	0.333397
LG14	11245000	0.526764	0.340506	1.547	0.186258	6.64216e+07	0	0.166673	0.199965
LG14	17475000	0.916992	0.523708	1.75096	0.393284	79107687	0	0.433324	0.449949
LG14	28175000	0.62088	0.248765	2.49585	0.372114	79814158	0	0.366729	0.400035
LG14	28185000	0.817427	0.317638	2.57345	0.499788	86010139	0	0.500019	0.533292
LG14	30295000	0.554545	0.164144	3.37841	0.390401	85231330	0	0.416668	0.416682
LG14	30895000	0.381529	0.206439	1.84814	0.175089	6.93514e+07	0	0.16671	0.200026
LG15	5945000	0.779022	0.235506	3.30786	0.543516	8.72055e+07	0	0.59996	0.599962
LG15	5965000	0.958834	0.385971	2.48421	0.572863	82037268	0	0.699972	0.699988
LG15	6255000	0.956434	0.579122	1.65152	0.377312	7.15045e+07	0	0.399992	0.400011
LG15	6305000	1.10692	0.675512	1.63864	0.431407	7.19524e+07	0	0.499977	0.500043
LG15	7575000	0.531317	0.323888	1.64044	0.207429	6.61638e+07	0	0.199979	0.199978
LG15	7585000	0.463094	0.288851	1.60323	0.174243	66757729	0	0.199951	0.199986
LG15	10795000	1.02065	0.60259	1.69377	0.418058	69903763	0	0.49999	0.500021
LG15	18985000	0.591841	0.325347	1.8191	0.266493	72662192	0	0.20006	0.299967
LG15	18995000	0.653245	0.378052	1.72792	0.275192	7.16699e+07	0	0.299942	0.300061
LG15	19005000	0.605799	0.248295	2.43984	0.357504	6.40443e+07	3.81422e-272	0.199964	0.199987
LG15	19225000	0.868533	0.542476	1.60105	0.326057	64417408	1.84813e-275	0.299983	0.299986
LG15	19235000	0.436296	0.193861	2.25057	0.242436	71518584	0	0.199942	0.200007
LG15	20245000	0.445015	0.193331	2.30184	0.251685	7.40842e+07	0	0.299956	0.299961
LG15	26305000	0.30176	0.122808	2.45717	0.178952	6.58636e+07	0	0.0999995	0.099998
LG15	26335000	0.291551	0.0554245	5.26033	0.236126	8.58452e+07	0	0.200035	0.200027
LG16	385000	0.484343	0.205689	2.35473	0.278654	7.49665e+07	0	0.250078	0.283286
LG16	395000	0.45353	0.231827	1.95633	0.221703	68604663	0	0.199949	0.216709
LG16	3105000	0.587183	0.29698	1.97718	0.290203	72391267	0	0.300006	0.33326
LG17	9165000	1.08178	0.554995	1.94918	0.526787	7.79783e+07	0	0.500009	0.500005
LG17	11555000	0.833957	0.353085	2.36192	0.480872	80908932	0	0.49998	0.500017
LG17	22275000	0.990981	0.533217	1.8585	0.457764	74138973	0	0.499972	0.49998
LG18	18015000	0.575572	0.175222	3.28481	0.40035	84493042	0	0.399935	0.399991
LG18	18025000	0.39984	0.189001	2.11554	0.210839	66534159	0	0.199998	0.199978
LG18	26775000	0.786321	0.388461	2.0242	0.39786	79025165	0	0.399996	0.400046
LG18	26815000	0.844116	0.340246	2.4809	0.50387	81121068	0	0.500002	0.599982
LG18	26825000	0.869543	0.430677	2.01901	0.438866	7.67244e+07	0	0.400001	0.499951
LG18	26835000	0.438066	0.186341	2.35088	0.251725	6.51647e+07	0	0.100056	0.100036
LG18	26845000	0.536286	0.19782	2.71098	0.338466	7.51217e+07	0	0.300039	0.300044
LG18	26945000	0.637986	0.143276	4.45286	0.494711	85576943	0	0.500007	0.500038
LG18	27755000	0.69671	0.347595	2.00437	0.349115	72210152	0	0.30005	0.399935
LG18	27855000	0.566453	0.264064	2.14514	0.30239	75645706	0	0.299968	0.300022
LG18	27865000	0.440436	0.0976502	4.51034	0.342786	78802151	0	0.299986	0.300018
LG18	28005000	0.540716	0.217848	2.48208	0.322868	74523168	0	0.299928	0.300072
LG19	7645000	0.888061	0.490811	1.80938	0.39725	68650158	0	0.399973	0.400026
LG19	14415000	0.482082	0.276512	1.74344	0.205569	63702539	1.04561e-252	0.100052	0.199954
LG19	14425000	0.442596	0.19927	2.22108	0.243326	7.14842e+07	0	0.200058	0.299976
LG20	275000	0.788281	0.50107	1.5732	0.287211	71121998	0	0.299972	0.30003
LG20	295000	0.685891	0.409229	1.67606	0.276662	7.03292e+07	0	0.299998	0.299971
LG20	395000	0.819508	0.539656	1.51857	0.279852	7.1469e+07	0	0.299995	0.299962
LG20	1315000	0.543256	0.30064	1.807	0.242616	71763996	0	0.200006	0.200022
LG20	1325000	0.7985	0.468123	1.70575	0.330377	65680617	0	0.200027	0.299975
LG20	1745000	0.415518	0.236386	1.75779	0.179132	64525067	3.56563e-285	0.100003	0.199998
LG20	1755000	0.571243	0.271413	2.1047	0.29983	6.99663e+07	0	0.299989	0.299983
LG20	1775000	0.742926	0.40148	1.85047	0.341446	7.21107e+07	0	0.300059	0.300059
LG20	3185000	0.325837	0.124788	2.61114	0.20105	72899982	0	0.199935	0.199981
LG20	3225000	0.293811	0.122538	2.39772	0.171273	7.03804e+07	0	0.100001	0.100044
LG20	3235000	0.290731	0.127757	2.27565	0.162974	68605299	0	0.100008	0.100028
LG20	3945000	0.929517	0.531707	1.74818	0.39781	74000927	0	0.400062	0.40003
LG20	4265000	0.89674	0.511729	1.75237	0.385011	7.42637e+07	0	0.399996	0.400003
LG20	6815000	0.70446	0.30459	2.31282	0.39987	78108769	0	0.400004	0.49995
LG20	11315000	0.881582	0.538916	1.63584	0.342666	7.28399e+07	0	0.300018	0.39997
LG20	12995000	0.850685	0.554215	1.53494	0.29647	67453949	0	0.299973	0.300039
LG20	13665000	0.459304	0.275142	1.66933	0.184162	6.2564e+07	2.21022e-211	0.100061	0.100017
LG20	13685000	0.612909	0.387761	1.58063	0.225147	5.71815e+07	5.40275e-72	4.86599e-08	0.0999756
LG20	13695000	0.409379	0.152665	2.68156	0.256714	6.59342e+07	0	0.100042	0.100026
LG20	13705000	0.280832	0.181812	1.54463	0.0990201	6.02854e+07	2.34102e-154	4.95567e-05	8.52591e-06
LG20	18815000	1.30677	0.510509	2.55974	0.79626	85845427	0	0.899946	0.900009
LG20	19355000	1.08551	0.646275	1.67964	0.439236	74854643	0	0.5	0.499931
LG20	20125000	1.20567	0.777082	1.55153	0.428587	71934609	0	0.400011	0.499977
LG20	20445000	0.829177	0.536616	1.5452	0.292561	68759240	0	0.299947	0.299941
LG20	20905000	0.763264	0.436666	1.74793	0.326597	70041673	0	0.300032	0.399987
LG20	23175000	0.926317	0.443976	2.08642	0.482342	7.71154e+07	0	0.500065	0.599946
LG20	23235000	1.10099	0.69689	1.57986	0.4041	72062485	0	0.399968	0.400059
LG20	23245000	0.861484	0.510249	1.68836	0.351235	7.16755e+07	0	0.399932	0.399969
LG20	23255000	1.02108	0.648565	1.57436	0.372513	7.04389e+07	0	0.39995	0.400066
LG20	23265000	0.80394	0.506749	1.58646	0.29719	69944834	0	0.399987	0.399959
LG20	25375000	1.13315	0.751905	1.50703	0.381242	7.2354e+07	0	0.399953	0.40004
LG20	26215000	1.02865	0.656754	1.56626	0.371893	72747862	0	0.400068	0.400012
LG22	4665000	0.520428	0.182622	2.84976	0.337806	79271733	0	0.300061	0.300052
LG23	785000	0.916068	0.364604	2.51251	0.551465	8.04197e+07	0	0.59993	0.600033
LG23	1555000	0.327327	0.167993	1.94846	0.159334	5.72976e+07	3.43904e-81	2.22505e-05	4.98331e-05
LG23	1615000	0.317408	0.171623	1.84945	0.145785	56090357	1.45698e-55	3.13677e-05	4.52631e-05
LG23	9325000	0.418808	0.124538	3.36291	0.294271	8.00572e+07	0	0.299951	0.299947
LG23	9565000	0.629617	0.294991	2.13436	0.334627	6.95339e+07	0	0.299979	0.30002
LG23	9605000	0.5981	0.316868	1.88754	0.281232	69742601	0	0.200038	0.299947
LG23	9615000	0.668323	0.29936	2.23251	0.368963	7.44441e+07	0	0.30004	0.399946
LG23	9625000	0.533707	0.281472	1.89613	0.252235	6.4212e+07	3.6003e-271	0.199996	0.199956
LG23	9635000	0.29749	0.122618	2.42616	0.174873	7.14146e+07	0	0.10004	0.199995
LG23	14455000	0.913629	0.456734	2.00035	0.456894	78538496	0	0.49995	0.499992
LG23	17985000	0.748515	0.342046	2.18835	0.406469	69386675	0	0.399976	0.400069
LG23	18885000	0.539076	0.283202	1.90351	0.255874	6.65584e+07	0	0.199962	0.200037
LG23	19535000	0.336946	0.153445	2.19588	0.183502	66798974	0	0.199961	0.199955

## Sheet: RuziziLakeRuL_F
Linkage_Group	pos	FmedianNormalWind	MmedianNormalWind	ratiomedianNormWind_FM	differenceNormWind_FM	Wilcox_statist	Wilcox_p_value	Wilcox_confint1	Wilcox_confint2
LG02	18405000	0.320508	0.19848	1.61481	0.122028	65185159	0	0.100049	0.100045
LG02	18625000	0.576872	0.279172	2.06637	0.2977	6.84552e+07	0	0.266606	0.299963
LG02	18655000	0.553845	0.330275	1.67692	0.223569	64575751	1.31933e-283	0.199958	0.200023
LG02	21045000	0.528187	0.194731	2.7124	0.333457	7.19329e+07	0	0.300005	0.333395
LG02	21415000	1.31465	0.793521	1.65673	0.521128	80329957	0	0.499981	0.516687
LG03	17785000	0.731294	0.137286	5.32678	0.594007	86150301	0	0.624995	0.666631
LG03	22175000	0.281855	0.0030372	92.8011	0.278818	87558988	0	0.333326	0.333263
LG03	22185000	0.433607	0.0286721	15.1229	0.404935	8.93136e+07	0	0.333423	0.333338
LG03	22505000	0.263257	0.0371463	7.08703	0.226111	76568462	0	0.166694	0.166716
LG03	23825000	0.790821	0.12475	6.33924	0.666071	87338909	0	0.666636	0.666584
LG03	24635000	0.304303	0.0115238	26.4064	0.292779	8.59137e+07	0	0.333312	0.333321
LG03	24935000	0.296337	0.0313219	9.46103	0.265015	73787216	0	0.166628	0.166576
LG03	25055000	0.378845	0.0157109	24.1135	0.363135	84714272	0	0.333287	0.333283
LG03	25065000	0.474419	0.0675057	7.02783	0.406913	7.98187e+07	0	0.333411	0.333374
LG03	25075000	0.602206	0.0408834	14.7298	0.561323	91918657	0	0.499916	0.499941
LG03	25175000	0.326234	0.0548195	5.95106	0.271415	7.10903e+07	0	0.166616	0.166647
LG03	27245000	0.385461	0.0281097	13.7128	0.357352	7.75732e+07	0	0.166728	0.166695
LG04	9665000	0.664314	0.181224	3.66571	0.48309	80104028	0	0.433327	0.466617
LG04	9735000	0.622608	0.265307	2.34675	0.357301	8.03259e+07	0	0.399979	0.399991
LG04	9745000	0.517018	0.030472	16.967	0.486546	9.25662e+07	0	0.499964	0.500026
LG04	9795000	0.461774	0.19978	2.31141	0.261994	7.21524e+07	0	0.233264	0.266632
LG04	9825000	0.268493	0.0841916	3.18907	0.184302	6.4753e+07	0	0.0166429	0.0333658
LG04	9835000	0.307479	0.118297	2.59923	0.189183	7.15165e+07	0	0.166691	0.19995
LG04	9875000	0.267883	0.0628187	4.26439	0.205064	75250334	0	0.11667	0.149972
LG04	14975000	0.751925	0.189973	3.95807	0.561952	80576030	0	0.600045	0.616623
LG05	2565000	0.493281	0.139078	3.5468	0.354203	84874976	0	0.300016	0.300043
LG05	2595000	0.553105	0.174791	3.16438	0.378314	82970453	0	0.399992	0.400072
LG05	2605000	0.551225	0.332742	1.65661	0.218483	68903530	0	0.200064	0.2334
LG05	16655000	0.327727	0.18259	1.79488	0.145137	5.75575e+07	2.25222e-89	5.59457e-05	1.74358e-05
LG05	16665000	0.433217	0.23581	1.83714	0.197407	6.47866e+07	4.17905e-298	0.166704	0.199944
LG05	16675000	0.549205	0.23051	2.38256	0.318695	7.50954e+07	0	0.299943	0.316659
LG06	3175000	0.457424	0.155334	2.94477	0.30209	74398019	0	0.300028	0.31662
LG06	5105000	0.671703	0.365188	1.83933	0.306514	74252503	0	0.300047	0.333294
LG07	1915000	0.545385	0.344132	1.58481	0.201253	6.41043e+07	2.2198e-263	0.183289	0.200006
LG07	7125000	1.01927	0.654376	1.55762	0.364892	72910137	0	0.383316	0.400024
LG07	15055000	1.27569	0.79957	1.59547	0.476122	75866616	0	0.46666	0.483377
LG07	15065000	1.05832	0.691364	1.53078	0.36696	75218056	0	0.383332	0.400006
LG07	15075000	1.05155	0.62158	1.69175	0.429975	77220314	0	0.433275	0.449979
LG07	15085000	0.80411	0.490468	1.63948	0.313642	68919393	0	0.316637	0.333265
LG07	15095000	1.09035	0.608847	1.79084	0.481504	8.17516e+07	0	0.433383	0.466583
LG07	15105000	1.00074	0.588599	1.70021	0.41214	7.98576e+07	0	0.433353	0.450002
LG07	20815000	1.05242	0.640661	1.64272	0.411764	74733514	0	0.433315	0.450058
LG07	34255000	0.960714	0.564269	1.70258	0.396445	76954457	0	0.433318	0.44993
LG07	34265000	1.05641	0.615113	1.71743	0.441301	7.39624e+07	0	0.483307	0.516623
LG07	43115000	1.0589	0.658626	1.60775	0.400278	7.11458e+07	0	0.433361	0.466703
LG07	50555000	0.624228	0.289413	2.15688	0.334815	7.86534e+07	0	0.399942	0.400027
LG07	55405000	0.906989	0.60229	1.5059	0.3047	67952796	0	0.316668	0.350041
LG08	1115000	0.620038	0.408009	1.51967	0.212029	67530206	0	0.20005	0.233269
LG08	2245000	0.823918	0.427524	1.92718	0.396394	76948855	0	0.400018	0.433306
LG08	14105000	0.464504	0.122079	3.80493	0.342424	85147530	0	0.399999	0.399956
LG09	1925000	0.346765	0.140836	2.46219	0.205929	71466378	0	0.199956	0.200051
LG10	10615000	0.776142	0.516365	1.50309	0.259777	6.64152e+07	0	0.250038	0.283312
LG10	11815000	0.50292	0.299495	1.67923	0.203425	6.89561e+07	0	0.266607	0.299951
LG10	19615000	0.253305	0.103931	2.43723	0.149373	62753193	9.06613e-241	0.0166679	0.050084
LG10	19625000	0.320958	0.118996	2.69721	0.201961	63302241	3.0114e-258	0.0666359	0.100016
LG13	35000	0.708079	0.499767	1.41682	0.208313	6.48944e+07	3.09198e-292	0.233341	0.266627
LG13	1085000	0.708309	0.448372	1.57974	0.259937	6.90117e+07	0	0.266706	0.299947
LG13	1925000	0.387491	0.241226	1.60634	0.146265	5.95262e+07	2.3527e-124	0.0666989	0.09996
LG13	2025000	0.478962	0.282038	1.69822	0.196924	61422823	2.31583e-179	0.100076	0.116722
LG13	3825000	0.658114	0.385845	1.70565	0.272269	73513023	0	0.316698	0.333391
LG13	3835000	0.563064	0.256049	2.19904	0.307014	7.24011e+07	0	0.299984	0.316659
LG13	9705000	0.688111	0.441856	1.55732	0.246255	68503224	0	0.250026	0.283361
LG13	11835000	0.967553	0.617072	1.56798	0.350482	74081461	0	0.383368	0.400041
LG13	14905000	1.04018	0.637645	1.63128	0.402531	79557940	0	0.433286	0.449962
LG13	15075000	0.609439	0.430174	1.41673	0.179265	6.06194e+07	1.39609e-149	0.149925	0.166669
LG13	23505000	0.70326	0.487876	1.44147	0.215383	64748477	2.56205e-286	0.200007	0.233356
LG13	23985000	0.538016	0.364214	1.4772	0.173803	64226879	1.26309e-266	0.150035	0.183316
LG14	7875000	0.492991	0.313977	1.57015	0.179014	6.35256e+07	6.25156e-243	0.149986	0.183293
LG15	26545000	0.268553	0.163475	1.64277	0.105078	6.51796e+07	0	0.0999469	0.100057
LG15	26555000	0.289901	0.150135	1.93094	0.139766	68694495	0	0.116728	0.133272
LG16	2985000	0.777352	0.336666	2.30897	0.440686	83411811	0	0.449956	0.466631
LG16	3015000	0.338626	0.187065	1.81021	0.151562	61314463	9.67253e-175	0.0834139	0.100005
LG16	4315000	0.534717	0.264207	2.02386	0.27051	6.75972e+07	0	0.200053	0.216612
LG16	8135000	1.00578	0.574551	1.75055	0.431229	81808427	0	0.416707	0.449963
LG16	21455000	0.2953	0.0660517	4.47075	0.229249	7.8553e+07	0	0.199987	0.19995
LG16	21465000	0.30301	0.159376	1.90123	0.143634	68342644	0	0.133296	0.149952
LG16	21475000	0.365623	0.0594857	6.14641	0.306138	81263560	0	0.199925	0.200031
LG18	9995000	0.750505	0.365503	2.05335	0.385001	80140715	0	0.399983	0.399971
LG18	18175000	0.360124	0.10361	3.47578	0.256514	74213571	0	0.199985	0.200023
LG18	18215000	0.548405	0.183512	2.98839	0.364894	8.10127e+07	0	0.400022	0.400045
LG18	22115000	0.519968	0.205599	2.52903	0.314369	8.16525e+07	0	0.399995	0.400065
LG18	25005000	0.642036	0.309119	2.07699	0.332917	6.70106e+07	0	0.200052	0.29994
LG18	27045000	0.424858	0.160564	2.64603	0.264294	7.28636e+07	0	0.20002	0.299961
LG19	13425000	0.407359	0.160194	2.54291	0.247165	7.36744e+07	0	0.200046	0.200042
LG19	14455000	0.323088	0.0915308	3.52982	0.231557	7.92491e+07	0	0.200031	0.200022
LG19	14515000	0.641486	0.29725	2.15807	0.344236	78967022	0	0.300017	0.300018
LG19	14525000	0.309569	0.0770623	4.01713	0.232507	7.76334e+07	0	0.199997	0.199911
LG19	14535000	0.481602	0.183312	2.62723	0.29829	77101140	0	0.299969	0.300048
LG19	14545000	0.443006	0.230507	1.92188	0.212499	68275869	0	0.199964	0.199988
LG20	735000	0.984592	0.651676	1.51086	0.332915	71996840	0	0.36667	0.399946
LG20	1745000	0.582812	0.339908	1.71462	0.242904	68662397	0	0.216674	0.249936
LG20	1855000	0.694321	0.443797	1.5645	0.250523	6.70233e+07	0	0.249994	0.283248
LG20	2245000	1.28983	0.851257	1.51521	0.438574	74303783	0	0.433344	0.466661
LG20	13735000	0.79525	0.448513	1.77308	0.346737	71993269	0	0.333384	0.366688
LG20	13745000	0.50485	0.14616	3.45408	0.358689	84229557	0	0.38341	0.399927
LG20	13765000	0.362434	0.11968	3.02836	0.242754	73566983	0	0.200009	0.233308
LG20	18445000	0.956314	0.633403	1.5098	0.322911	6.88944e+07	0	0.316622	0.34997
LG20	21005000	0.925717	0.604506	1.53136	0.321211	70702745	0	0.349962	0.366648
LG20	28185000	0.683492	0.406826	1.68006	0.276666	67997641	0	0.266719	0.299949
LG23	1655000	0.987541	0.446097	2.21374	0.541444	8.19733e+07	0	0.533382	0.566667
LG23	17145000	0.818918	0.302711	2.70528	0.516207	7.79499e+07	0	0.566734	0.599945
LG23	18515000	0.340226	0.160634	2.11802	0.179592	64973650	0	0.0999536	0.0999425
LG23	18525000	0.882702	0.473253	1.86518	0.409449	7.20417e+07	0	0.499964	0.500019
LG23	19485000	0.324368	0.0611106	5.30788	0.263257	7.84519e+07	0	0.249997	0.299974

[truncated: 12 more sheets: RuziziStreamRu1_F, ChitiliLakeChL_M, ChitiliRiverCh1_M, KalamboLakeKaL_M, KalamboRiverKa1_M, KalamboRiverKa2_M, LufubuLakeLfL_M, LufubuRiverLf2_M, LunzuaLakeLzL_M, LunzuaRiverLz1_M, RuziziLakeRuL_M, RuziziStreamRu1_M]
